# Supplementary material for: Copper-catalyzed nucleophilic trifluoromethylation of propargylic halides
Source: Royal Society of Chemistry journal article supplement (doi:10.1039/c3cc44434a), 2013-01-01

## Supporting Information

### Copper-Catalyzed Nucleophilic Trifluoromethylation of Propargylic Halides

Yoshihiro Miyake, Shin-ichi Ota, Masashi Shibata, Kazunari Nakajima and Yoshiaki Nishibayashi\*

*Institute of Engineering Innovation, School of Engineering, The University of Tokyo, Yayoi, Bunkyo-ku, Tokyo 113-8656, Japan*

#### General Methods.

<sup>1</sup>H NMR (270 MHz) and <sup>13</sup>C NMR (67.8 MHz) spectra were measured on a JEOL Excalibur 270 spectrometer using CDCl<sub>3</sub> as solvent unless otherwise noted. <sup>19</sup>F NMR (471 MHz) spectra were recorded on a JEOL JNM-ECP 500 spectrometer. HPLC analyses were performed on Hitachi L-7100 and apparatus equipped with a UV detector using 25 cm x 4.6 mm DAICEL Chiralpak OJ-H columns. Elemental analyses were performed at Microanalytical Center of The University of Tokyo. Mass spectra were measured on a JEOL JMS-700 mass spectrometer. Weight of reagents were measured on Mettler Toledo AL204 Laboratory Balance

All reactions were carried out under dry nitrogen atmosphere. Solvents were dried by the usual methods, then distilled under N<sub>2</sub> and degassed before use. CF<sub>3</sub>SiMe<sub>3</sub> is commercially available and was distilled before use. Potassium fluoride (KF) was dried under vacuum at 190 °C overnight and stored in a glove box. Copper (I) thiophene 2-carboxylate (CuTC) was prepared according to the reported method.<sup>S1</sup> 3-Phenylpropargyl chloride (**1a**) was prepared by the reaction of the corresponding propargylic alcohol with PCl<sub>3</sub> and pyridine.<sup>S2</sup> Other primary propargylic alcohols were prepared by the reaction of the corresponding propargylic alcohol with SOCl<sub>2</sub> and pyridine as described below. Secondary propargylic chlorides were prepared from corresponding alcohols and PPh<sub>3</sub> in CCl<sub>4</sub>.<sup>S3</sup> Trifluoromethylated products such as **2a**,<sup>S4</sup> **2b**,<sup>S4</sup> **2d**,<sup>S4</sup> **2h**,<sup>S4</sup> **2k**,<sup>S4</sup> **2l**<sup>S2</sup> and **3l**<sup>S2</sup> were known compounds.

#### Preparation of Primary Propargylic Halides (1b-1k)

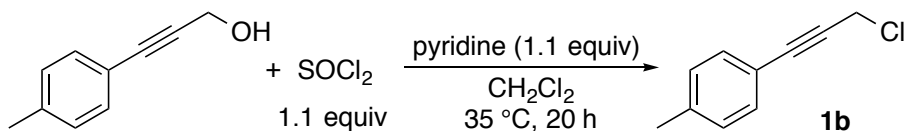

A typical experimental procedure for the preparation of 1-(3-chloroprop-1-yn-1-yl)-4-methylbenzene (**1b**). In a 50 mL Schlenk flask was placed 3-(*p*-tolyl)prop-2-yn-1-ol (732.6 mg, 5.0 mmol). Anhydrous and degassed CH<sub>2</sub>Cl<sub>2</sub> (10 mL) and pyridine (440 μL, 5.5 mmol) were added. After the addition of SOCl<sub>2</sub> (400 μL, 5.5 mmol) at

0 °C, the reaction flask was kept 35 °C for 20 h. The solution was poured into water (20 mL) and the resulting mixture was extracted with CH<sub>2</sub>Cl<sub>2</sub> (15 mL x 3). The combined extracts were washed with brine, and dried over anhydrous MgSO<sub>4</sub>. After the concentration under reduced pressure, the resulting residue was purified by column chromatography (SiO<sub>2</sub>, eluent: hexane) to give **1b** as yellow oil (584.3 mg, 3.55 mmol, 71% isolated yield).<sup>S5</sup>

Spectroscopic data of other products are as follows.

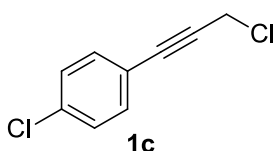

**1c**:<sup>S6</sup> A pale yellow oil. <sup>1</sup>H NMR δ 7.38 (d, *J* = 8.8 Hz, 2H), 7.29 (d, *J* = 8.8 Hz, 2H), 4.36 (s, 2H). <sup>13</sup>C NMR δ 135.0, 133.1, 128.7, 120.5, 85.1, 84.7, 30.9.

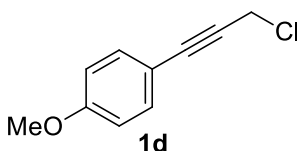

**1d**:<sup>S6</sup> A yellow oil. <sup>1</sup>H NMR δ 7.39 (d, *J* = 8.9 Hz, 2H), 6.84 (d, *J* = 8.9 Hz, 2H), 4.38 (s, 2H), 3.82 (s, 3H). <sup>13</sup>C NMR δ 160.1, 133.4, 114.1, 114.0, 86.4, 82.5, 55.3, 31.5.

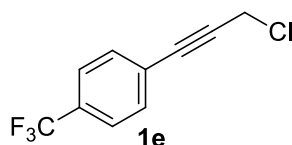

**1e**: A yellow oil. <sup>1</sup>H NMR δ 7.53-7.61 (m, 4H), 4.38 (s, 2H). <sup>13</sup>C NMR δ 132.1, 130.6 (q, <sup>2</sup>*J*<sub>C-F</sub> = 32.7 Hz), 125.8 (q, <sup>4</sup>*J*<sub>C-F</sub> = 1.5 Hz), 125.3 (q, <sup>3</sup>*J*<sub>C-F</sub> = 3.7 Hz), 123.8 (q, <sup>1</sup>*J*<sub>C-F</sub> = 272 Hz), 86.2, 84.8, 30.6. HRMS (EI) Calcd for C<sub>10</sub>H<sub>6</sub>ClF<sub>3</sub> [M]: 218.0110. Found: 218.0117.

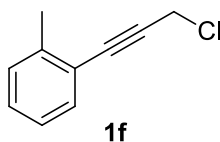

**1f**: A yellow oil. <sup>1</sup>H NMR δ 7.41 (d, *J* = 7.3 Hz, 1H), 7.10-7.26 (m, 3H), 4.42 (s, 2H), 2.43 (s, 3H). <sup>13</sup>C NMR δ 140.6, 132.2, 129.5, 128.9, 125.5, 121.8, 87.6, 85.4, 31.3, 20.6. HRMS (EI) Calcd for C<sub>10</sub>H<sub>9</sub>Cl [M]: 164.0393. Found: 164.0387.

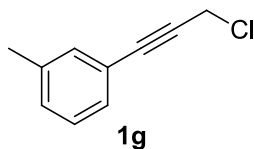

**1g:**<sup>S6</sup> A pale yellow oil. <sup>1</sup>H NMR δ 7.13-7.30 (m, 4H), 4.37 (s, 2H), 2.33 (s, 3H). <sup>13</sup>C NMR δ 138.0, 132.4, 129.8, 128.9, 128.2, 121.8, 86.5, 83.4, 31.2, 21.2.

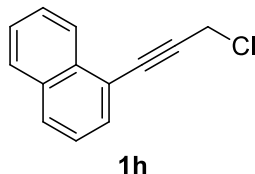

**1h:** A yellow oil. <sup>1</sup>H NMR δ 8.28-8.32 (m, 1H), 7.84-7.87 (m, 2H), 7.67-7.70 (m, 1H), 7.49-7.62 (m, 2H), 7.40-7.45 (m, 1H), 4.53 (s, 2H). <sup>13</sup>C NMR δ 133.3, 133.1, 130.9, 129.4, 128.3, 127.0, 126.5, 126.0, 125.1, 119.7, 88.5, 84.6, 31.3. HRMS (EI) Calcd for C<sub>13</sub>H<sub>9</sub>Cl [M]: 200.0393. Found: 200.0395.

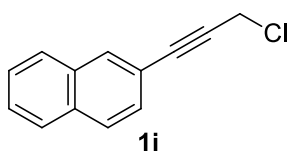

**1i:** A white solid, m.p. 41.4-42.3 °C. <sup>1</sup>H NMR δ 7.99 (s, 1H), 7.77-7.84 (m, 3H), 7.47-7.52 (m, 3H), 4.43 (s, 2H). <sup>13</sup>C NMR δ 133.0, 132.8, 132.0, 128.2, 128.0, 127.8, 127.7, 127.0, 126.6, 119.3, 86.7, 84.0, 31.2. Anal Calcd for C<sub>13</sub>H<sub>9</sub>Cl: C, 77.81; H, 4.52. Found: C, 77.75; H, 4.66.

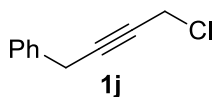

**1j:**<sup>S7</sup> A yellow oil. <sup>1</sup>H NMR δ 7.22-7.33 (m, 5H), 4.20 (t, *J* = 2.3 Hz, 2H), 3.66 (t, *J* = 2.3 Hz, 2H). <sup>13</sup>C NMR (C<sub>6</sub>D<sub>6</sub>) δ 136.3, 128.7, 128.1, 126.9, 85.2, 77.6, 30.8, 25.1.

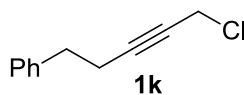

**1k:**<sup>S8</sup> A yellow oil. <sup>1</sup>H NMR δ 7.20-7.33 (m, 5H), 4.13 (t, *J* = 2.3 Hz, 2H), 2.84 (t, *J* = 7.5 Hz, 2H), 2.53 (tt, *J* = 7.5 and 2.3 Hz, 2H). <sup>13</sup>C NMR δ 140.3, 128.4, 126.4, 86.8, 75.7, 34.7, 31.1, 21.0.

Spectroscopic data of secondary propargylic chlorides are as follows.

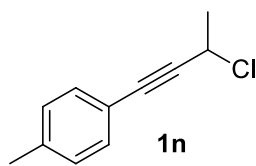

**1n:** A colorless oil.  $^1\text{H NMR}$   $\delta$  7.33 (d,  $J = 8.0$  Hz, 2H), 7.12 (d,  $J = 8.0$  Hz, 2H), 4.89 (q,  $J = 6.8$  Hz, 1H), 2.35 (s, 3H), 1.84 (d,  $J = 6.8$  Hz, 3H).  $^{13}\text{C NMR}$   $\delta$  138.9, 131.7, 129.0, 119.0, 87.7, 85.0, 44.8, 26.7, 21.5. HRMS (EI) Calcd for  $\text{C}_{11}\text{H}_{11}\text{Cl}$  [M]: 178.0549. Found: 178.0542.

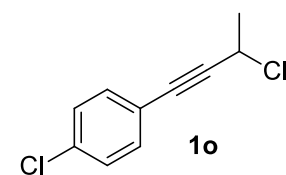

**1o:** A white solid.  $^1\text{H NMR}$   $\delta$  7.37 (d,  $J = 8.6$  Hz, 2H), 7.29 (d,  $J = 8.6$  Hz, 2H), 4.87 (q,  $J = 6.8$  Hz, 1H), 1.84 (d,  $J = 6.8$  Hz, 3H).  $^{13}\text{C NMR}$   $\delta$  134.9, 133.0, 128.7, 120.6, 89.3, 84.2, 44.3, 26.5. Anal Calcd for  $\text{C}_{10}\text{H}_8\text{Cl}_2$ : C, 60.38; H, 4.05. Found: C. 60.22; H. 4.15.

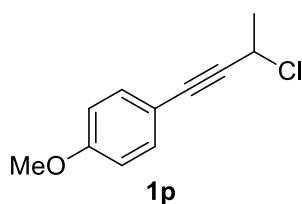

**1p:** A colorless oil.  $^1\text{H NMR}$   $\delta$  7.38 (d,  $J = 8.8$  Hz, 2H), 6.84 (d,  $J = 8.8$  Hz, 2H), 4.89 (q,  $J = 6.8$  Hz, 1H), 3.81 (s, 3H), 1.84 (d,  $J = 6.8$  Hz, 3H).  $^{13}\text{C NMR}$   $\delta$  160.0, 133.3, 114.1, 113.9, 87.1, 85.4, 55.3, 45.0, 26.7. HRMS (EI) Calcd for  $\text{C}_{11}\text{H}_{11}\text{ClO}$  [M]: 194.0498. Found: 194.0502.

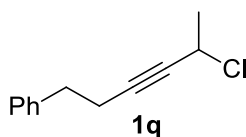

**1q:** A colorless oil.  $^1\text{H NMR}$   $\delta$  7.19-7.33 (m, 5H), 4.64 (qt,  $J = 6.8$  and 2.2 Hz, 1H), 2.83 (t, 7.5 Hz, 2H), 2.52 (dt,  $J = 7.5$  and 2.2 Hz, 2H), 1.70 (d,  $J = 6.8$  Hz, 3H).  $^{13}\text{C NMR}$   $\delta$  140.4, 128.5, 128.4, 126.3, 85.7, 80.5, 44.7, 34.8, 26.9, 21.0. HRMS (EI) Calcd for  $\text{C}_{12}\text{H}_{13}\text{Cl}$  [M]: 192.0706. Found: 192.0707.

## Copper-Catalyzed Trifluoromethylation of Propargylic Halides (1)

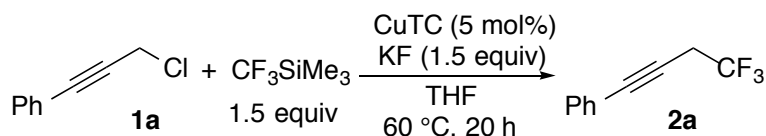

A typical experimental procedure for the reaction of 3-phenyl propargyl chloride (**1a**) with  $\text{CF}_3\text{SiMe}_3$  is described below. In a 20 mL Schlenk flask were placed CuTC (4.7 mg, 0.025 mmol) and KF (43.8 mg, 0.75 mmol). Anhydrous and degassed THF (3.0 mL) was added, and then the mixture was magnetically stirred at room temperature. After the addition of **1a** (75.6 mg, 0.50 mmol) and  $\text{CF}_3\text{SiMe}_3$  (110  $\mu\text{L}$ , 0.74 mmol), the reaction flask was kept at 60 °C for 20 h. The solution was poured into water (5 mL) and the resulting mixture was extracted with diethyl ether (30 mL x 3). The combined extracts were washed with brine, and dried over anhydrous  $\text{MgSO}_4$ . After the concentration under reduced pressure, the resulting residue was purified by column chromatography ( $\text{SiO}_2$ , eluent: hexane) to give **2a** as a colorless oil (67.6 mg, 0.367 mmol, 73% isolated yield)<sup>S4</sup>

In all of the reactions noted in Table 2, the formation of only a small amount (less than 5%) of the allenyl compounds **3b-3k** was confirmed in the crude products.

Isolated yields and spectroscopic data of other products **2** are as follows.

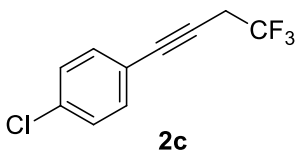

**2c**: 71% yield. A pale yellow oil.  $^1\text{H}$  NMR 7.35-7.39 (m, 2H), 7.28-7.32 (m, 2H), 3.27 (q,  $J = 9.5$  Hz, 2H).  $^{13}\text{C}$  NMR  $\delta$  134.8, 133.1, 128.7, 124.1 (q,  $^1J_{\text{C-F}} = 277$  Hz), 120.6, 82.3, 78.5 (q,  $^3J_{\text{C-F}} = 5.2$  Hz), 26.8 (q,  $^2J_{\text{C-F}} = 34.8$  Hz).  $^{19}\text{F}$  NMR  $\delta$  -68.6 (t,  $J = 11.5$  Hz). HRMS (EI) Calcd for  $\text{C}_{10}\text{H}_6\text{ClF}_3$  [M]: 218.0110 Found 218.0005.

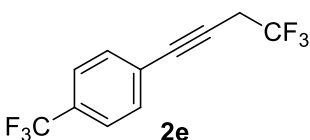

**2e**: 75% yield. A colorless oil.  $^1\text{H}$  NMR  $\delta$  7.53-7.60 (br m, 4H), 3.30 (q,  $J = 9.5$  Hz, 2H).  $^{13}\text{C}$  NMR  $\delta$  132.1, 130.5 (q,  $^2J_{\text{C-F}} = 32.7$  Hz), 126.0 (q,  $^4J_{\text{C-F}} = 1.5$  Hz), 125.3 (q,  $^3J_{\text{C-F}} = 3.9$  Hz), 124.0 (q,  $^1J_{\text{C-F}} = 276$  Hz), 123.8 (q,  $^1J_{\text{C-F}} = 271$  Hz), 83.1, 80.1 (q,  $^3J_{\text{C-F}} = 5.0$  Hz), 26.8 (q,  $^2J_{\text{C-F}} = 34.8$  Hz).

$^{19}\text{F}$  NMR  $\delta$  -65.2, -68.6 (t,  $J$  = 11.5 Hz). HRMS (EI) Calcd for  $\text{C}_{11}\text{H}_6\text{F}_6$  [M]: 252.0374 Found 252.0375.

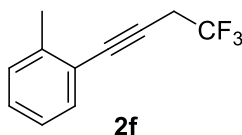

**2f**: 84% yield. A colorless oil.  $^1\text{H}$  NMR  $\delta$  7.40 (d,  $J$  = 7.6 Hz, 1H), 7.11-7.26 (m, 3H), 3.31 (q,  $J$  = 9.6 Hz, 2H), 2.42 (s, 3H).  $^{13}\text{C}$  NMR  $\delta$  140.6, 132.0, 129.5, 128.7, 125.5, 124.3 (q,  $^1J_{\text{C-F}}$  = 276 Hz), 122.0, 83.3, 81.3 (q,  $^3J_{\text{C-F}}$  = 4.8 Hz), 26.9 (q,  $^2J_{\text{C-F}}$  = 34.6 Hz), 20.4. HRMS (EI) Calcd for  $\text{C}_{11}\text{H}_9\text{F}_3$  [M]: 198.0656. Found: 198.0648.

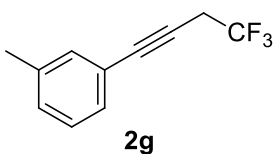

**2g**: 70% yield. A colorless oil.  $^1\text{H}$  NMR  $\delta$  7.13-7.27 (m, 4H), 3.26 (q,  $J$  = 9.5 Hz, 2H), 2.33 (s, 3H).  $^{13}\text{C}$  NMR ( $\text{C}_6\text{D}_6$ )  $\delta$  138.2, 132.8, 129.7, 129.2, 128.5, 124.9 (q,  $^1J_{\text{C-F}}$  = 276 Hz), 122.5, 85.1, 77.6 (q,  $^3J_{\text{C-F}}$  = 5.2 Hz), 26.3 (q,  $^2J_{\text{C-F}}$  = 34.4 Hz), 20.9. HRMS (EI) Calcd for  $\text{C}_{11}\text{H}_9\text{F}_3$  [M]: 198.0656. Found: 198.0653.

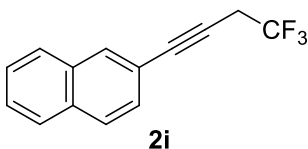

**2i**: 72% yield. A white solid, m.p. 48.0-49.0 °C.  $^1\text{H}$  NMR  $\delta$  7.98 (s, 1H), 7.77-7.83 (m, 3H), 7.46-7.53 (m, 3H), 3.32 (q,  $J$  = 9.5 Hz, 2H).  $^{13}\text{C}$  NMR  $\delta$  133.0, 132.8, 131.9, 128.3, 128.0, 127.7, 126.8, 126.6, 124.3 (q,  $^1J_{\text{C-F}}$  = 276 Hz), 119.4, 84.7, 77.7 (q,  $^3J_{\text{C-F}}$  = 5.0 Hz), 26.9 (q,  $^2J_{\text{C-F}}$  = 34.8 Hz).  $^{19}\text{F}$  NMR  $\delta$  -68.7 (t,  $J$  = 11.5 Hz). Anal Calcd for  $\text{C}_{14}\text{H}_9\text{F}_3$ : C, 71.79; H, 3.87. Found: C, 71.64; H, 4.07.

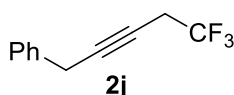

**2j**: 80% yield. A pale yellow oil.  $^1\text{H}$  NMR  $\delta$  7.22-7.34 (m, 5H), 3.62 (t,  $J$  = 2.6 Hz, 2H), 3.22 (qt,  $J$  = 9.6 and 2.6 Hz, 2H).  $^{13}\text{C}$  NMR  $\delta$  136.2, 128.6, 127.8, 126.7, 124.4 (q,  $^1J_{\text{C-F}}$  = 276 Hz), 82.4, 70.5 (q,  $^3J_{\text{C-F}}$  = 5.2 Hz), 26.2 (q,  $^2J_{\text{C-F}}$  = 34.6 Hz), 24.9.  $^{19}\text{F}$  NMR  $\delta$  -69.1 (t,  $J$  = 11.5 Hz).

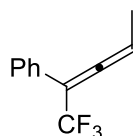

**3m**

**3m:** 89% yield. A colorless oil.  $^1\text{H}$  NMR  $\delta$  7.29-7.44 (m, 5H), 5.88-5.95 (m, 1H), 1.88 (d,  $J = 7.3$  Hz, 3H).  $^{13}\text{C}$  NMR  $\delta$  205.1 (q,  $^3J_{\text{C-F}} = 4.1$  Hz), 130.3, 128.6, 127.9, 127.0, 123.5 (q,  $^1J_{\text{C-F}} = 273$  Hz), 101.2 (q,  $^2J_{\text{C-F}} = 34.2$  Hz), 94.7, 13.3.  $^{19}\text{F}$  NMR  $\delta$  -62.8. HRMS (EI) Calcd for  $\text{C}_{11}\text{H}_9\text{F}_3$  [M]: 198.0656. Found: 198.0652.

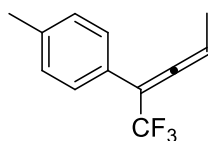

**3n**

**3n:** 79% yield. A colorless oil.  $^1\text{H}$  NMR  $\delta$  7.31 (d,  $J = 8.0$  Hz, 2H), 7.17 (d,  $J = 8.0$  Hz, 2H), 5.86-5.95 (m, 1H), 2.35 (s, 3H), 1.87 (d,  $J = 7.3$  Hz, 3H).  $^{13}\text{C}$  NMR  $\delta$  204.8 (q,  $^3J_{\text{C-F}} = 4.1$  Hz), 137.9, 129.3, 127.3, 127.0 (q,  $^3J_{\text{C-F}} = 1.5$  Hz), 123.5 (q,  $^1J_{\text{C-F}} = 273$  Hz), 101.1 (q,  $^2J_{\text{C-F}} = 34.2$  Hz), 94.5, 21.1, 13.3 (q,  $^5J_{\text{C-F}} = 1.5$  Hz). HRMS (EI) Calcd for  $\text{C}_{12}\text{H}_{11}\text{F}_3$  [M]: 212.0813. Found: 212.0812

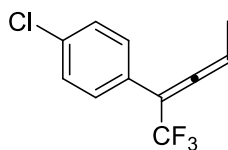

**3o**

**3o:** 81% Yield. A colorless oil.  $^1\text{H}$  NMR  $\delta$  7.33-7.35 (br m, 4H), 5.89-5.99 (m, 1H), 1.88 (d,  $J = 7.3$  Hz, 3H).  $^{13}\text{C}$  NMR  $\delta$  205.0 (q,  $^3J_{\text{C-F}} = 4.1$  Hz), 133.9, 128.82, 128.77, 128.3 (q,  $^3J_{\text{C-F}} = 1.5$  Hz), 123.3 (q,  $^1J_{\text{C-F}} = 273$  Hz), 100.5 (q,  $^2J_{\text{C-F}} = 34.8$  Hz), 95.2, 13.2.  $^{19}\text{F}$  NMR  $\delta$  -63.0. HRMS (EI) Calcd for  $\text{C}_{11}\text{H}_8\text{ClF}_3$  [M]: 232.0267. Found: 232.0262.

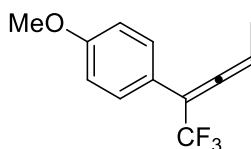

**3p**

**3p:** 77% Yield. A colorless oil.  $^1\text{H}$  NMR  $\delta$  7.35 (d,  $J = 8.6$  Hz, 2H), 6.86-6.92 (m, 2H), 5.82-5.93 (m, 1H), 3.81 (s, 3H), 1.86 (d,  $J = 7.3$  Hz, 3H).  $^{13}\text{C}$  NMR  $\delta$  204.5 (q,  $^3J_{\text{C-F}} = 4.3$  Hz), 159.4, 128.3 (q,  $^3J_{\text{C-F}} = 1.5$  Hz), 123.6 (q,  $^1J_{\text{C-F}} = 273$  Hz), 122.4, 114.1, 100.7 (q,  $^2J_{\text{C-F}} = 34.2$  Hz), 94.5, 55.2, 13.4 (q,  $^5J_{\text{C-F}} = 1.5$  Hz). HRMS (EI) Calcd for  $\text{C}_{12}\text{H}_{11}\text{F}_3\text{O}$  [M]: 228.0762. Found: 228.0757.

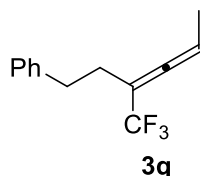

**3q:** 71% Yield. A colorless oil.  $^1\text{H}$  NMR  $\delta$  7.26-7.32 (m, 2H), 7.18-7.21 (m, 3H), 5.49-5.58 (m, 1H), 2.77 (t,  $J$  = 7.6 Hz, 2H), 2.40-2.47 (m, 2H), 1.64 (d,  $J$  = 7.0 Hz, 3H).  $^{13}\text{C}$  NMR  $\delta$  203.2 (q,  $^3J_{\text{C-F}}$  = 4.1 Hz), 140.8, 128.43, 128.37, 126.1, 124.0 (q,  $^1J_{\text{C-F}}$  = 273 Hz), 97.5 (q,  $^2J_{\text{C-F}}$  = 33.8 Hz), 93.7, 33.5, 27.8, 13.4 (q,  $^3J_{\text{C-F}}$  = 1.5 Hz).  $^{19}\text{F}$  NMR  $\delta$  -66.5. HRMS (EI) Calcd for  $\text{C}_{13}\text{H}_{13}\text{F}_3$  [M]: 226.0969. Found: 226.0979

### Copper-Catalyzed Trifluoromethylation of (*R*)-**1m**

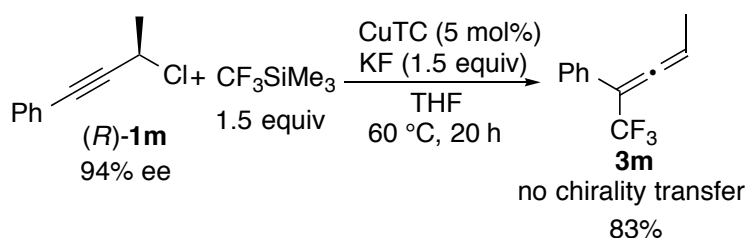

In a 20 mL Schlenk flask were placed CuTC (4.9 mg, 0.026 mmol) and KF (43.3 mg, 0.75 mmol). Anhydrous and degassed THF (3.0 mL) was added, and then the mixture was magnetically stirred at room temperature. After the addition of (*R*)-**1m**<sup>S3</sup> (82.5 mg, 0.50 mmol, 94% ee) and  $\text{CF}_3\text{SiMe}_3$  (110  $\mu\text{L}$ , 0.74 mmol), the reaction flask was kept at 60 °C for 20 h. The solution was poured into water (5 mL) and the resulting mixture was extracted with diethyl ether (30 mL x 3). The combined extracts were washed with brine, and dried over anhydrous  $\text{MgSO}_4$ . After the concentration under reduced pressure, the resulting residue was purified by column chromatography ( $\text{SiO}_2$ , eluent: hexane) to give **3m** as a colorless oil (82.0 mg, 0.413 mmol, 83% isolated yield). The optical purity of **3m** was determined by HPLC analysis; DAICEL Chiralpak OJ-H (x2), hexane/*i*PrOH = 98 /2, flow rate 0.5 mL/min,  $\lambda$  = 254 nm, retention time 19.0 min and 19.8 min, 4% ee.

### References and Notes

- (S1) Zhang, S.; Zhang, D.; Liebeskind, L. S. *J. Org. Chem.* **1997**, *62*, 2312.
- (S2) Zhao, T. S. N.; Szabó, K. J. *Org. Lett.* **2012**, *14*, 3966.
- (S3) Ogoshi, S.; Nishida, T.; Shinagawa, T.; Kurosawa, H. *J. Am. Chem. Soc.* **2001**, *123*, 7164.
- (S4) Liu, C.-B.; Meng, W.; Li, F.; Wang, S.; Nie, J.; Ma, J.-A. *Angew. Chem. Int. Ed.* **2012**, *51*, 6227.
- (S5) Vyas, D. J.; Hazra, C. K.; Oestreich, M. *Org. Lett.* **2011**, *13*, 4462.
- (S6) Hayami, J.; Tanaka, N.; Kaji, A. *Bull. Chem. Soc. Jpn.* **1973**, *46*, 954.
- (S7) Gelin, R.; Pigasse, D. *Bull. Soc. Chim. Fr.* **1971**, 1840.
- (S8) Khorana, N.; Purohit, A.; Herrick-Davis, K.; Teitler, M.; Glennon, R. A. *Bioorg. Med. Chem.* **2003**, *11*, 717.



# $^1\text{H}$ , $^{13}\text{C}$ and $^{19}\text{F}$ NMR spectra

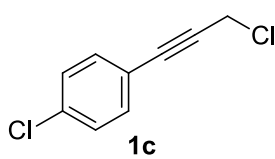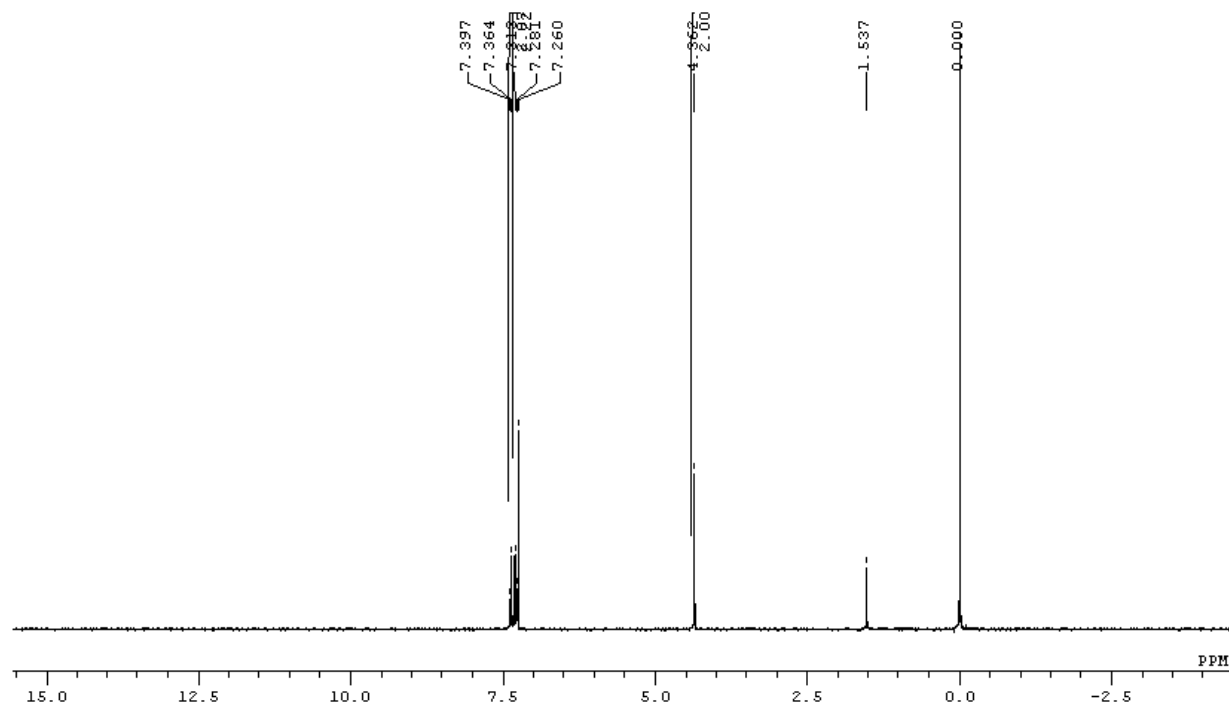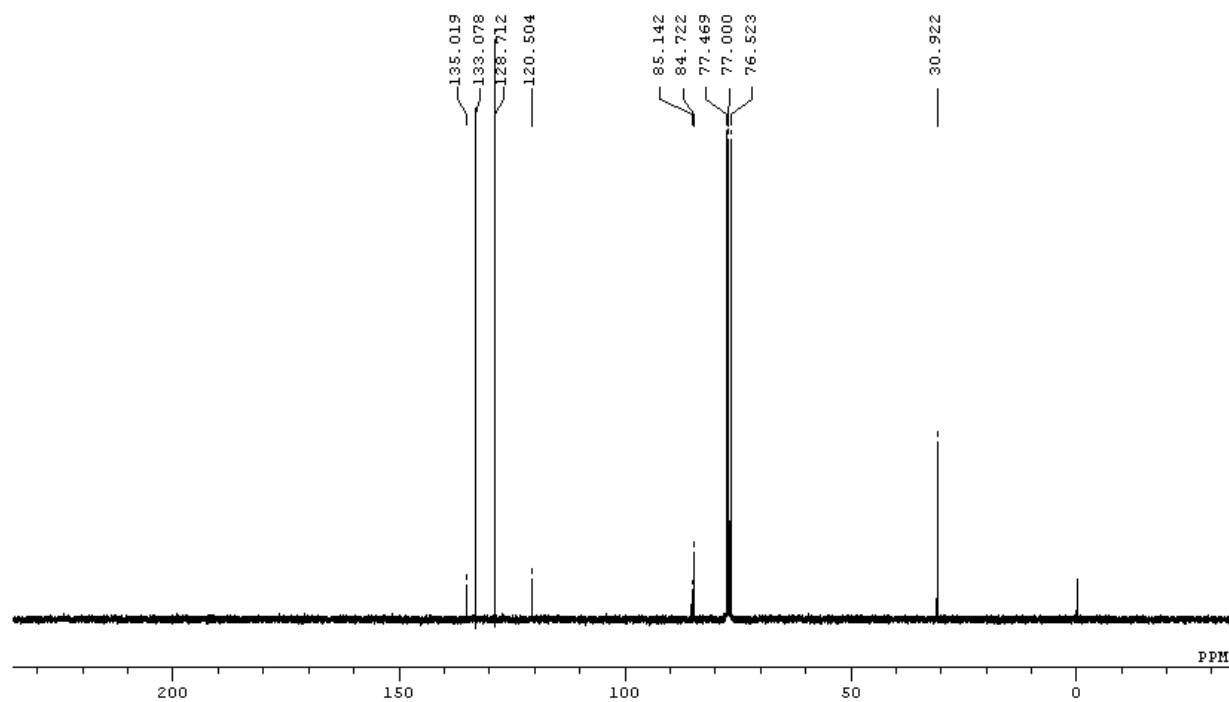

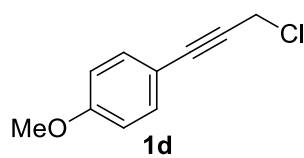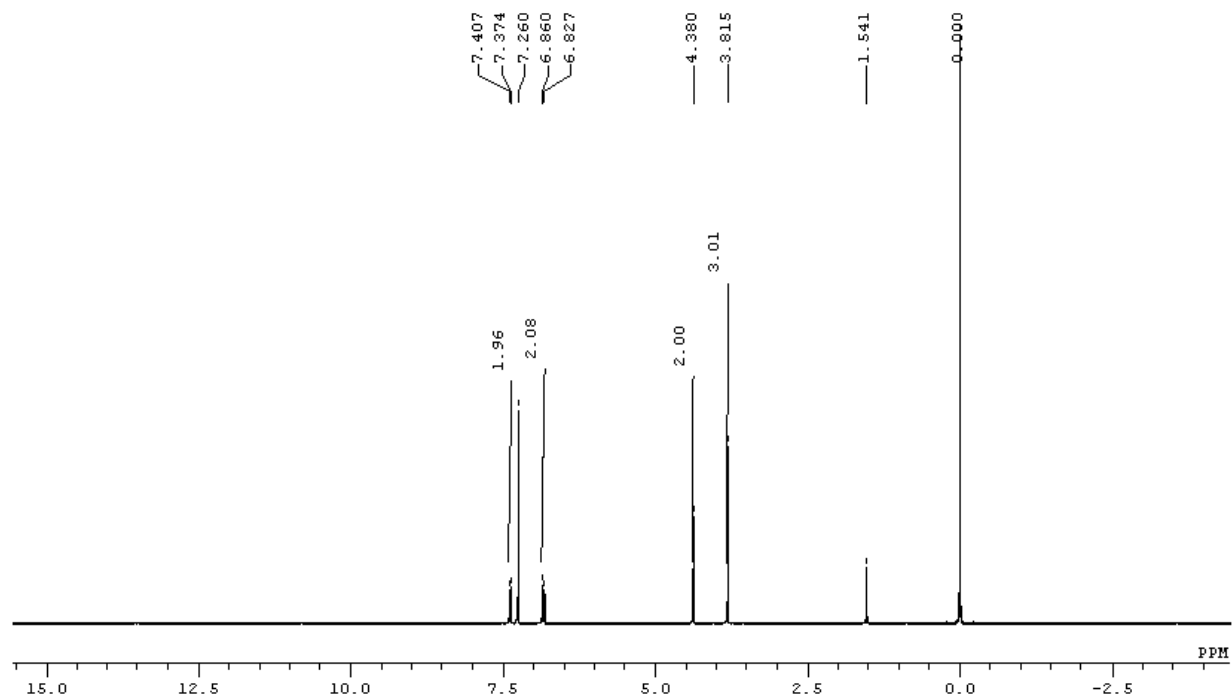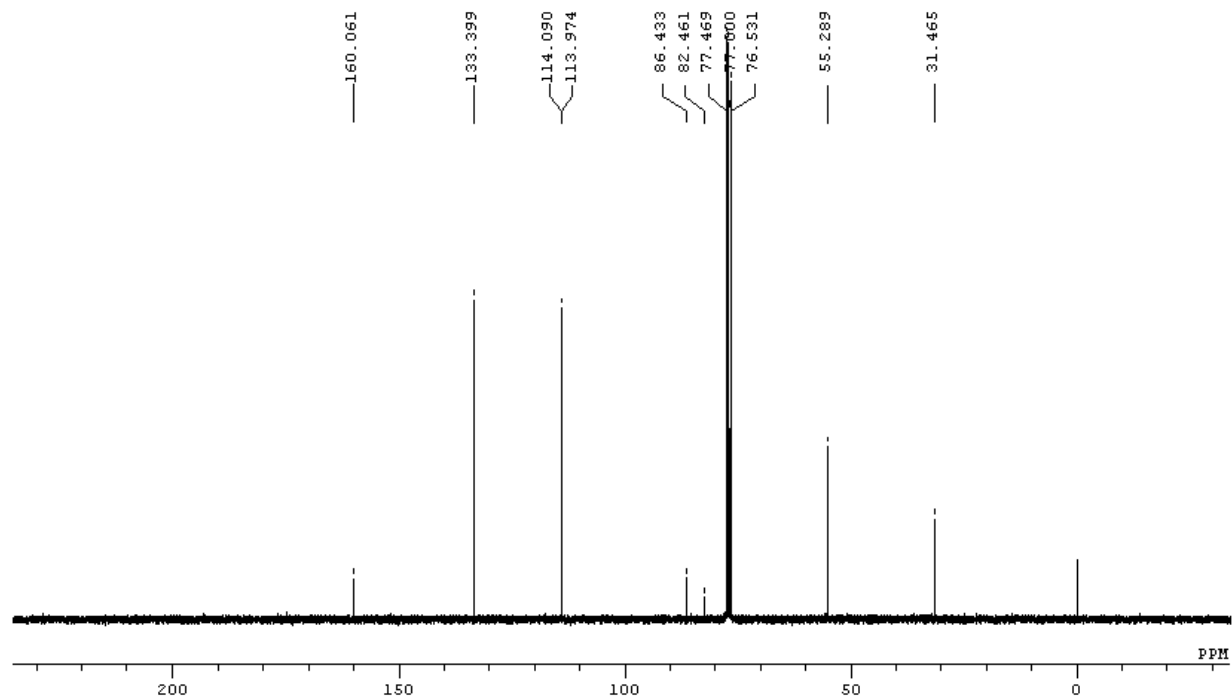

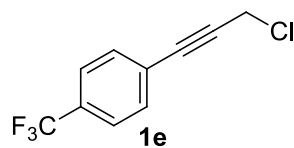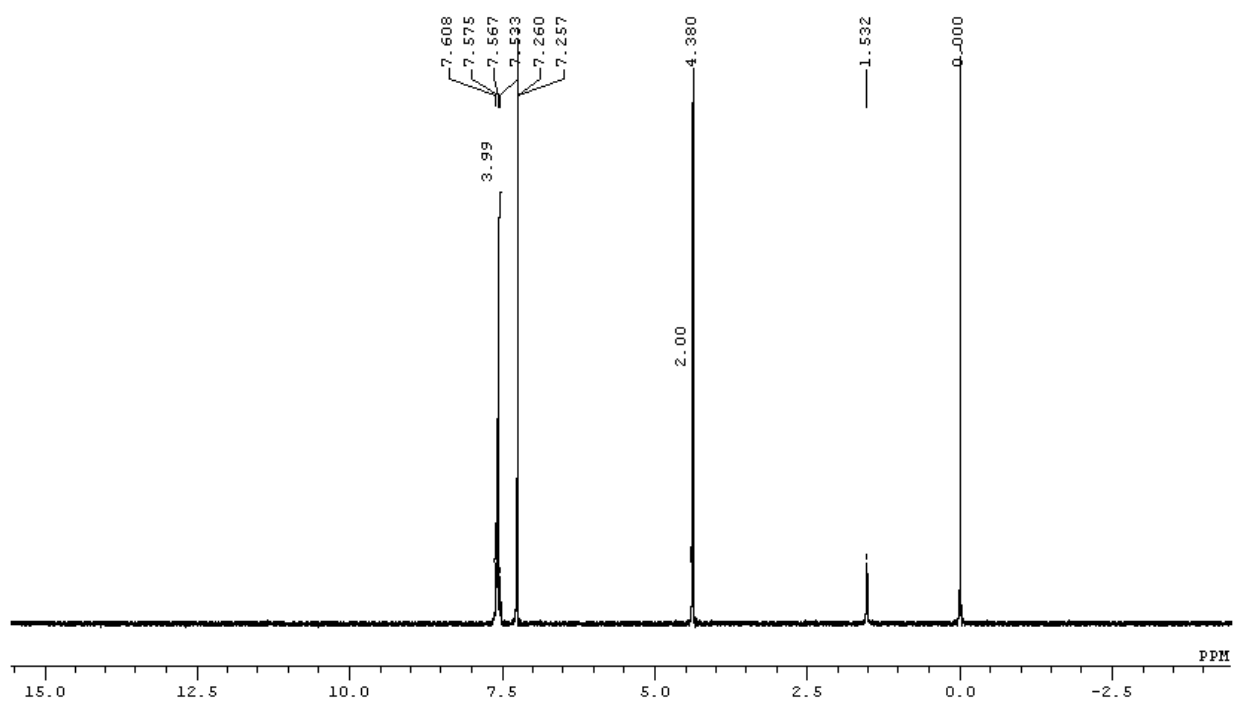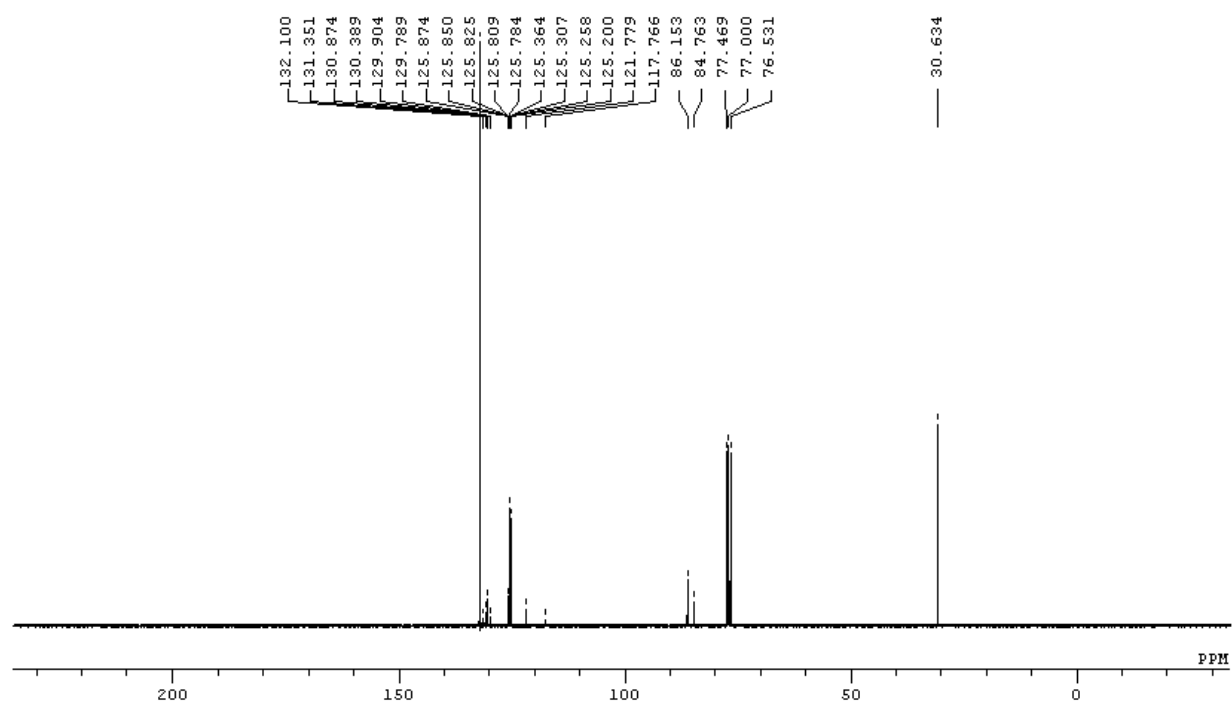

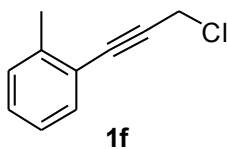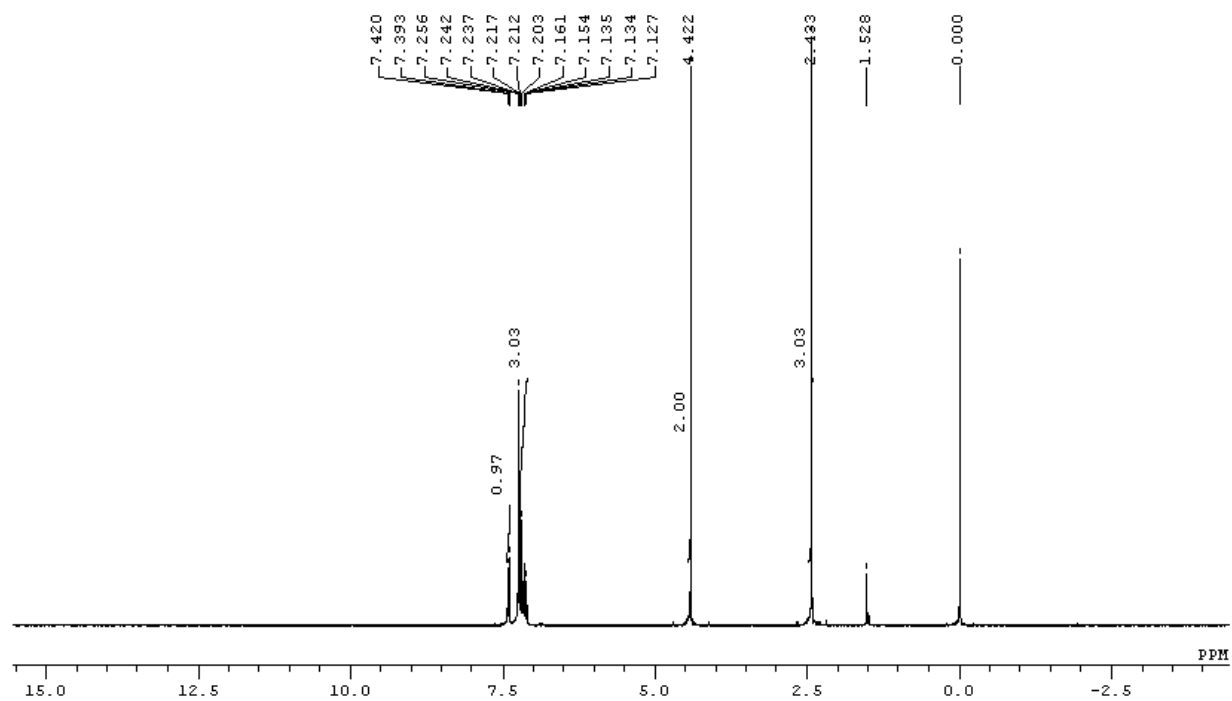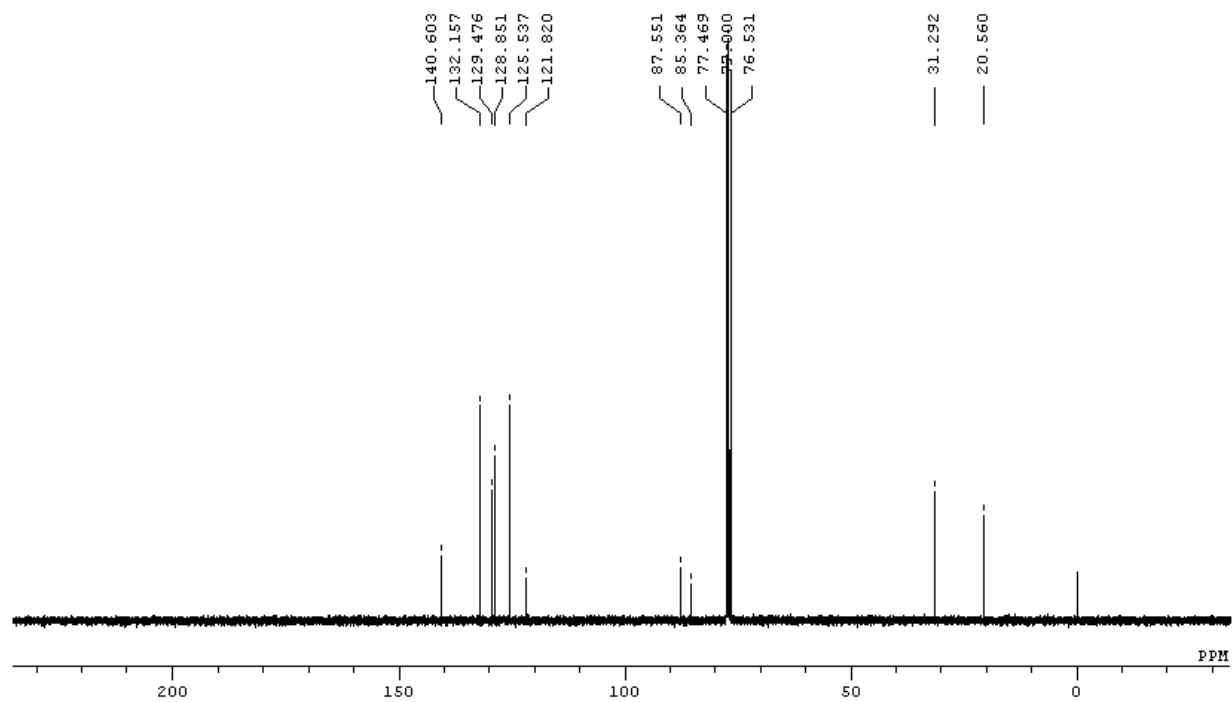

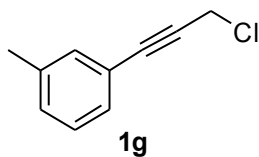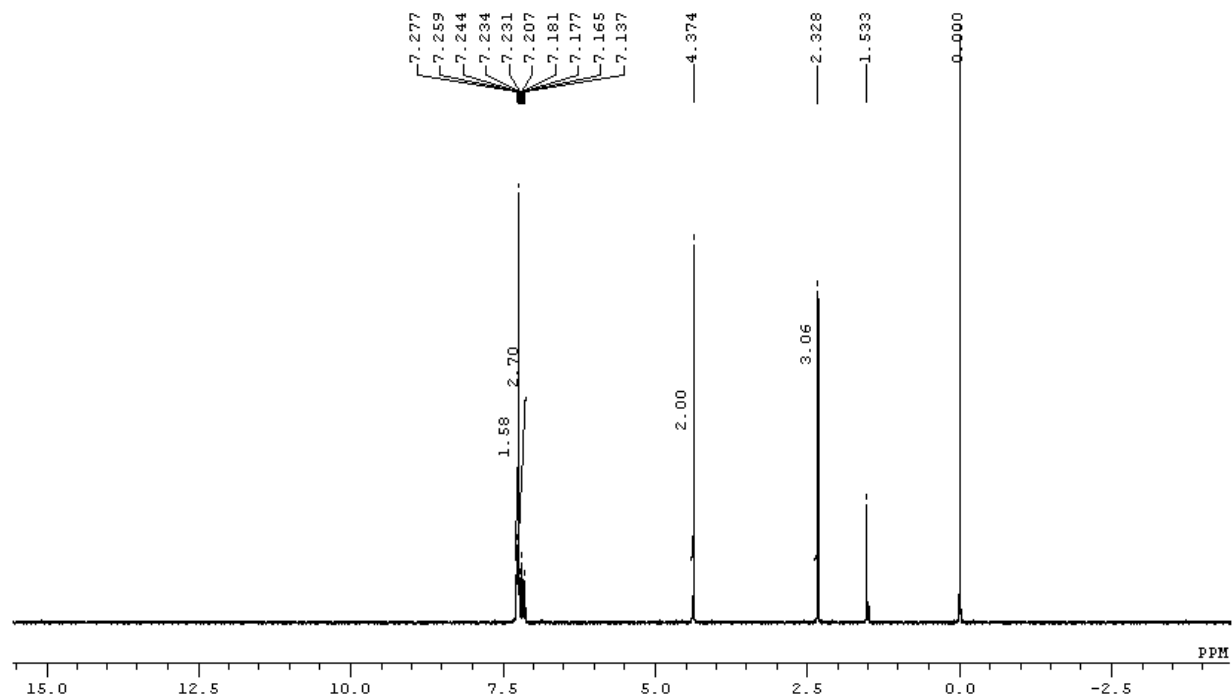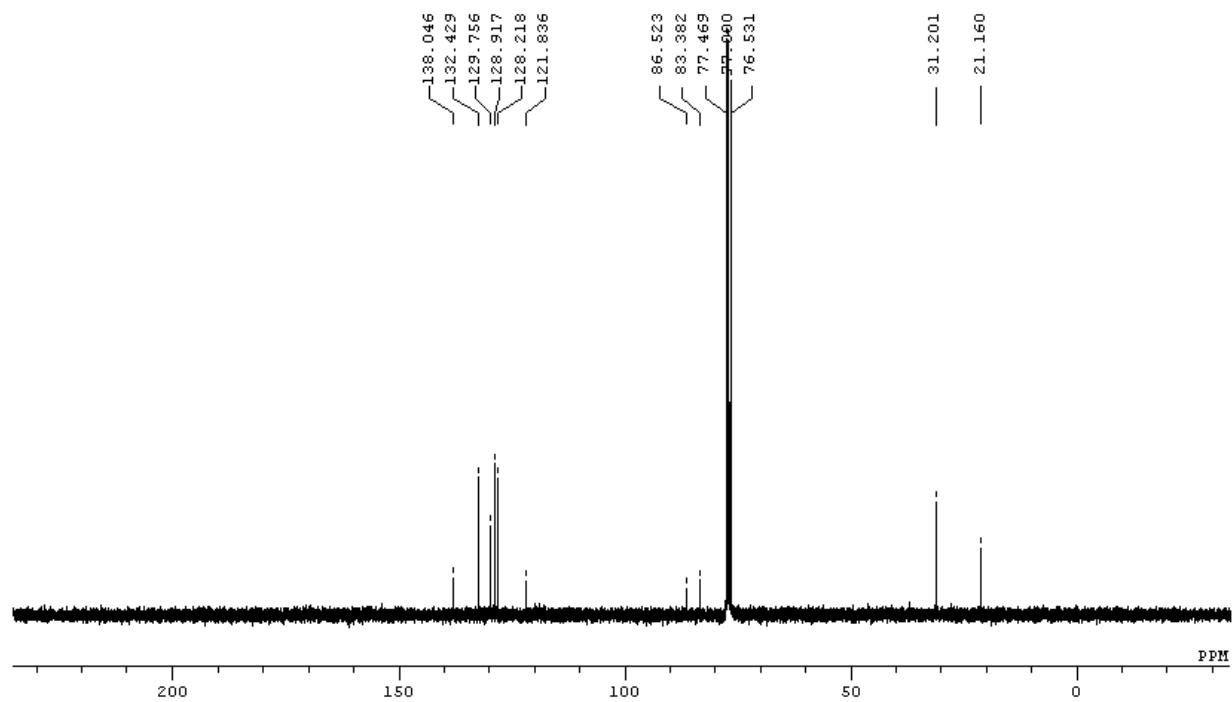

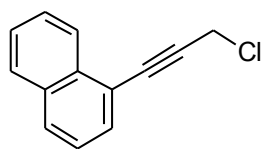

1h

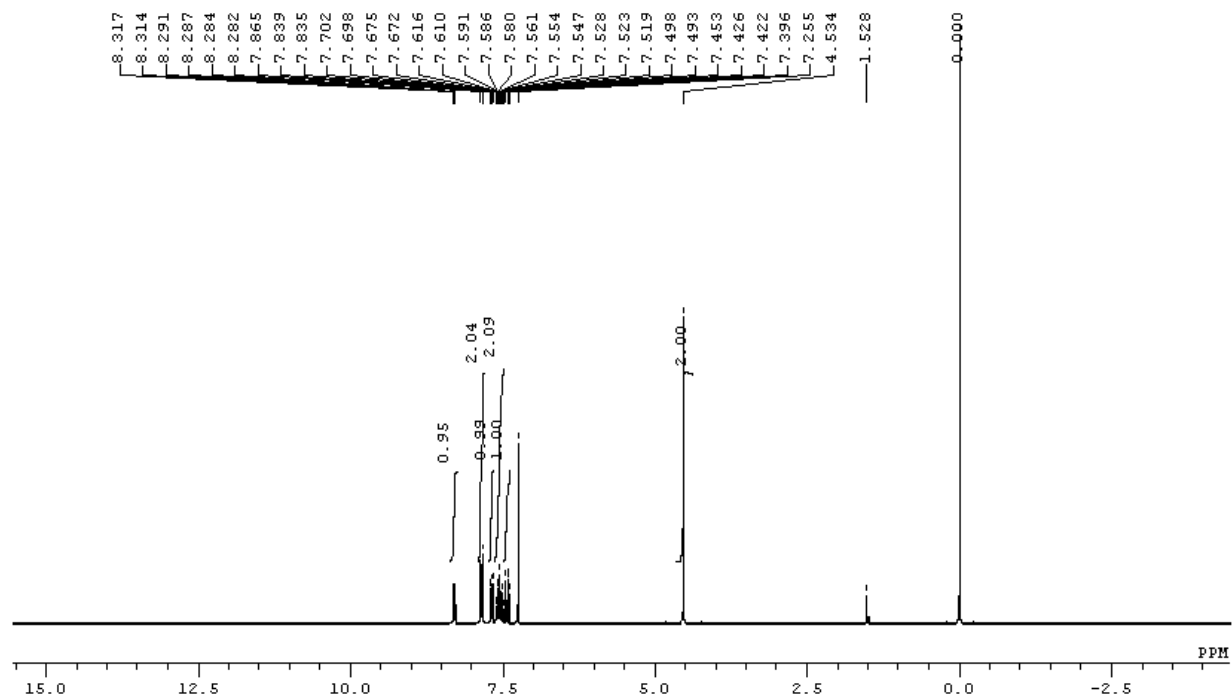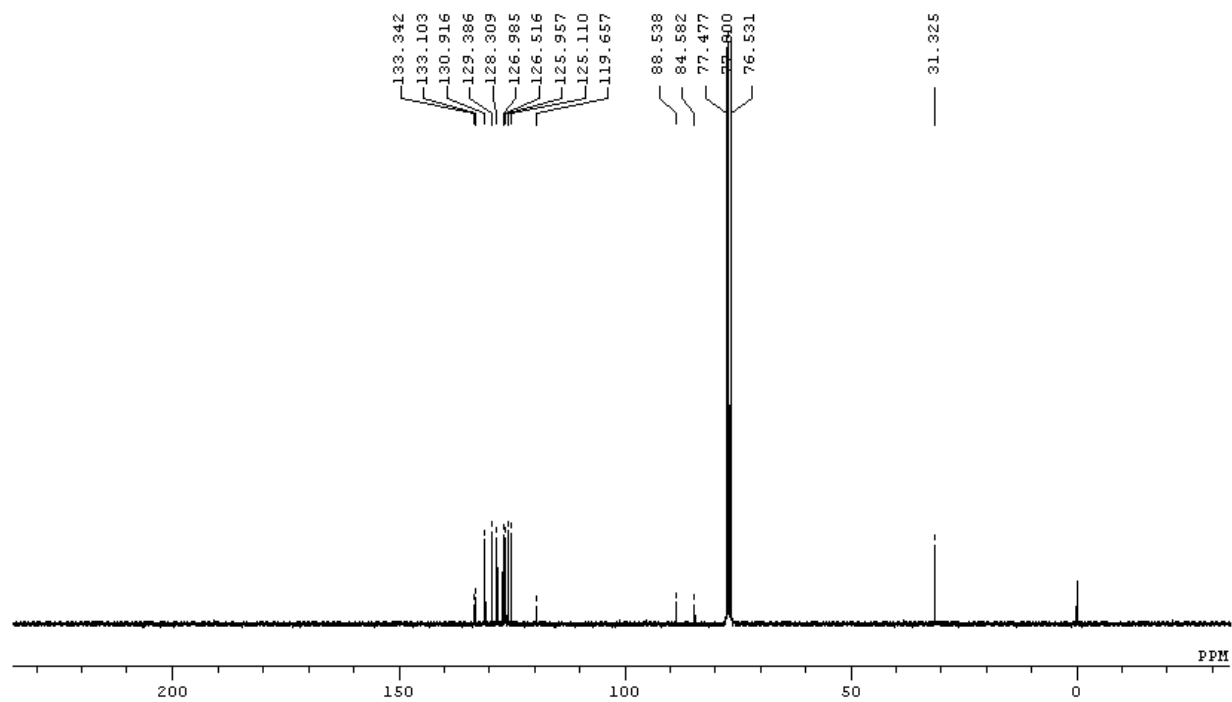

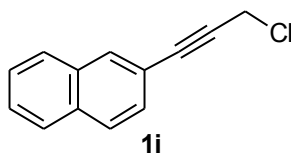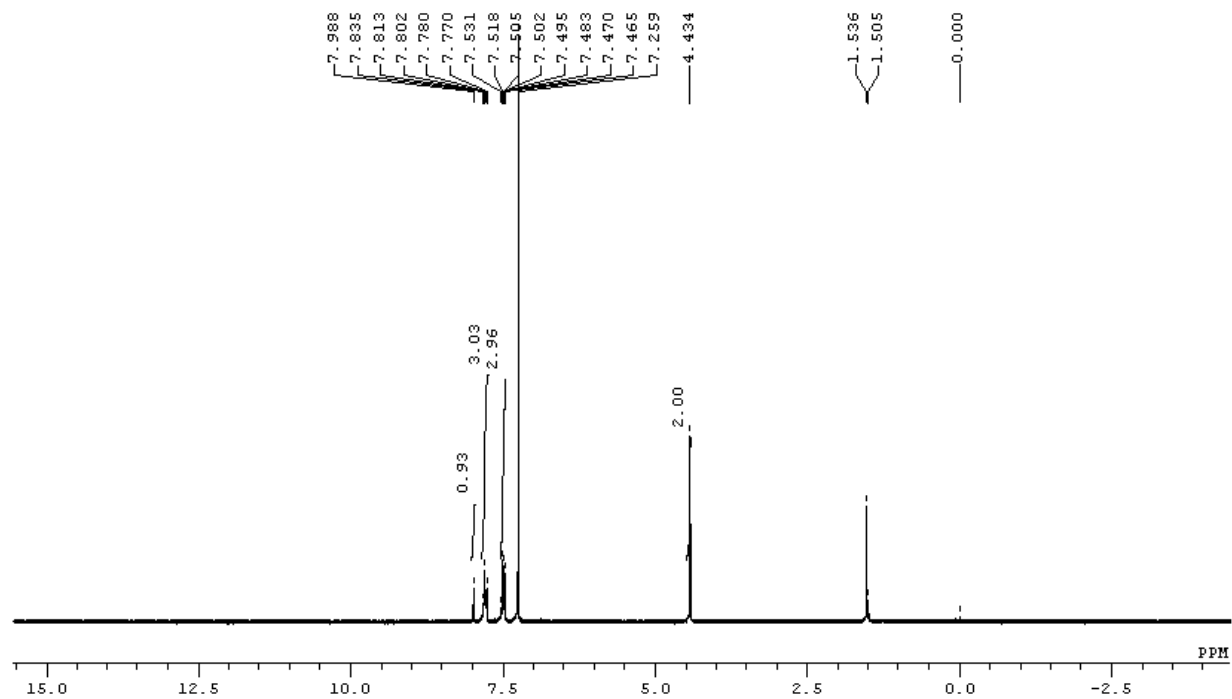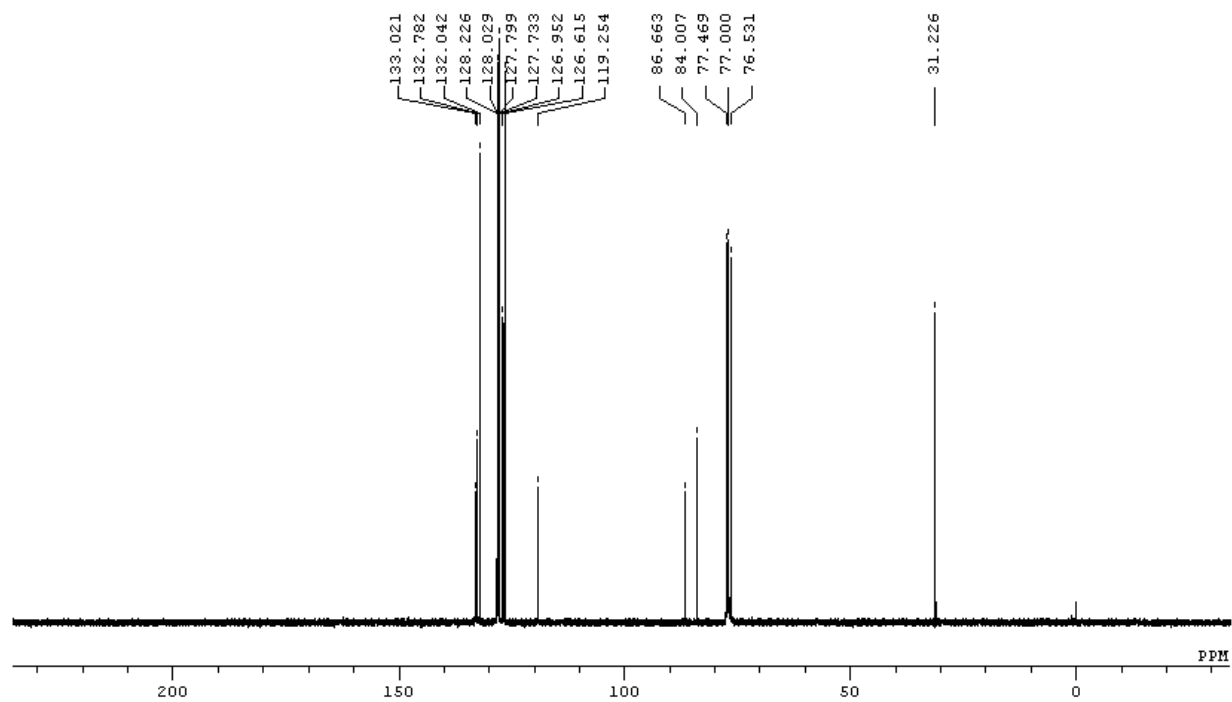

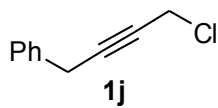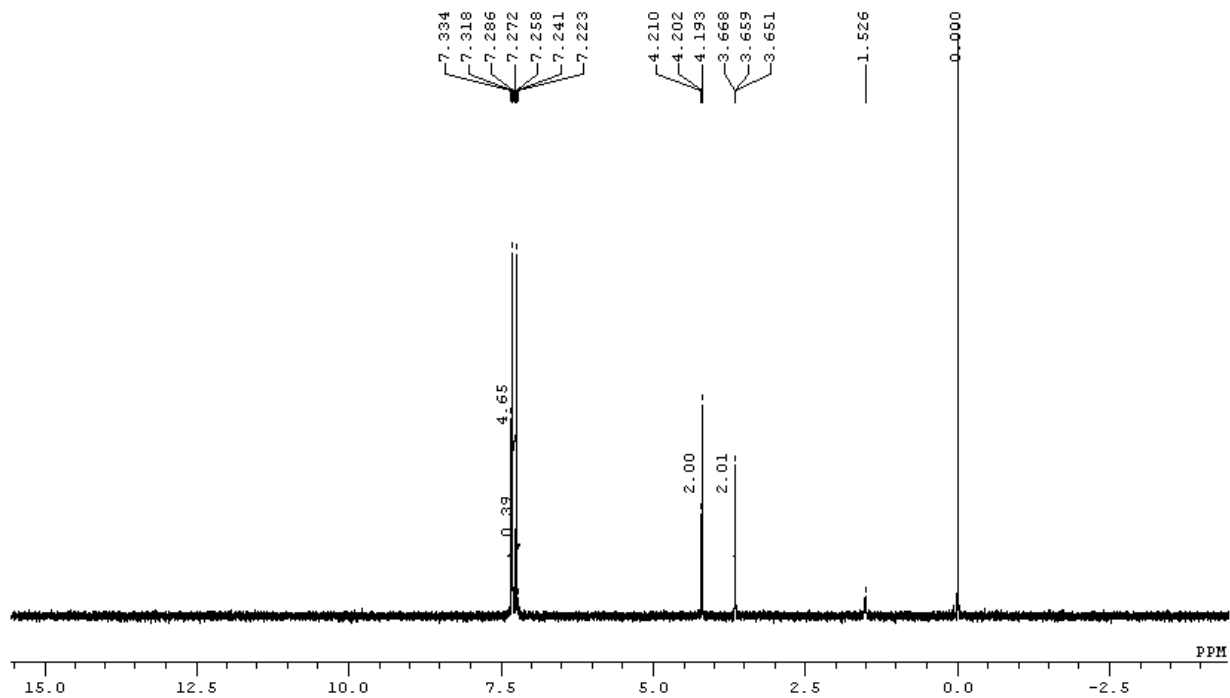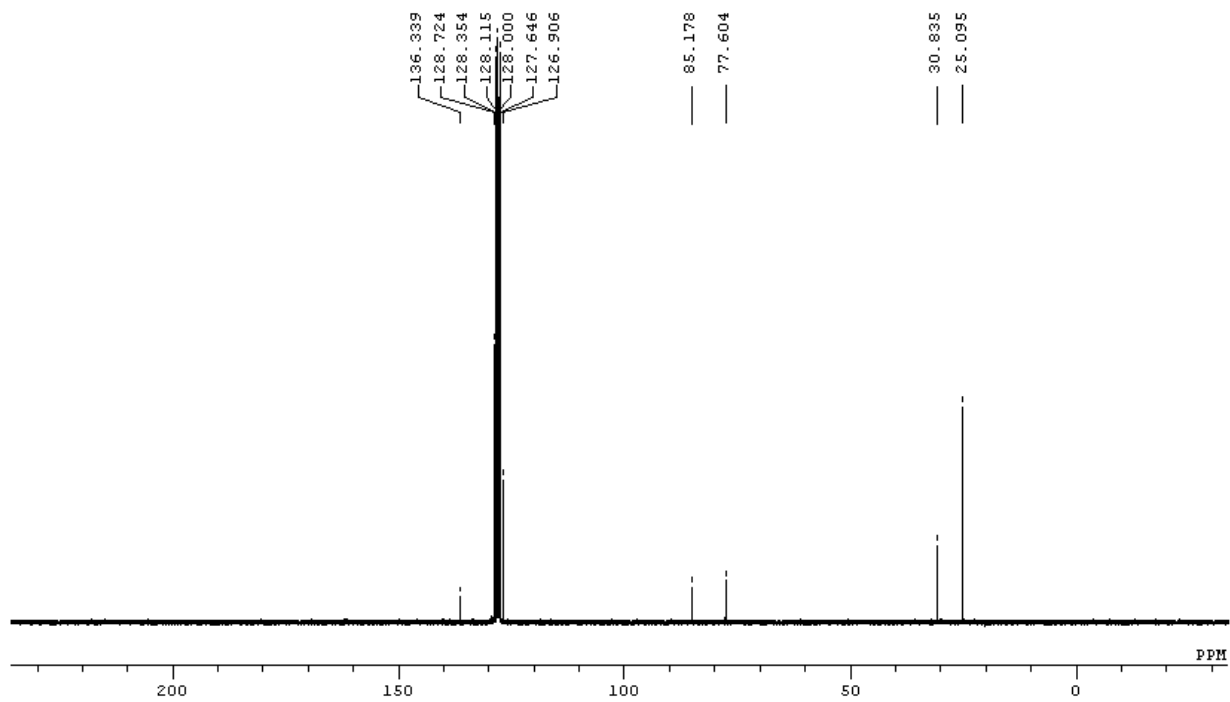



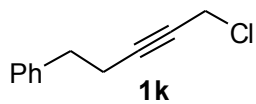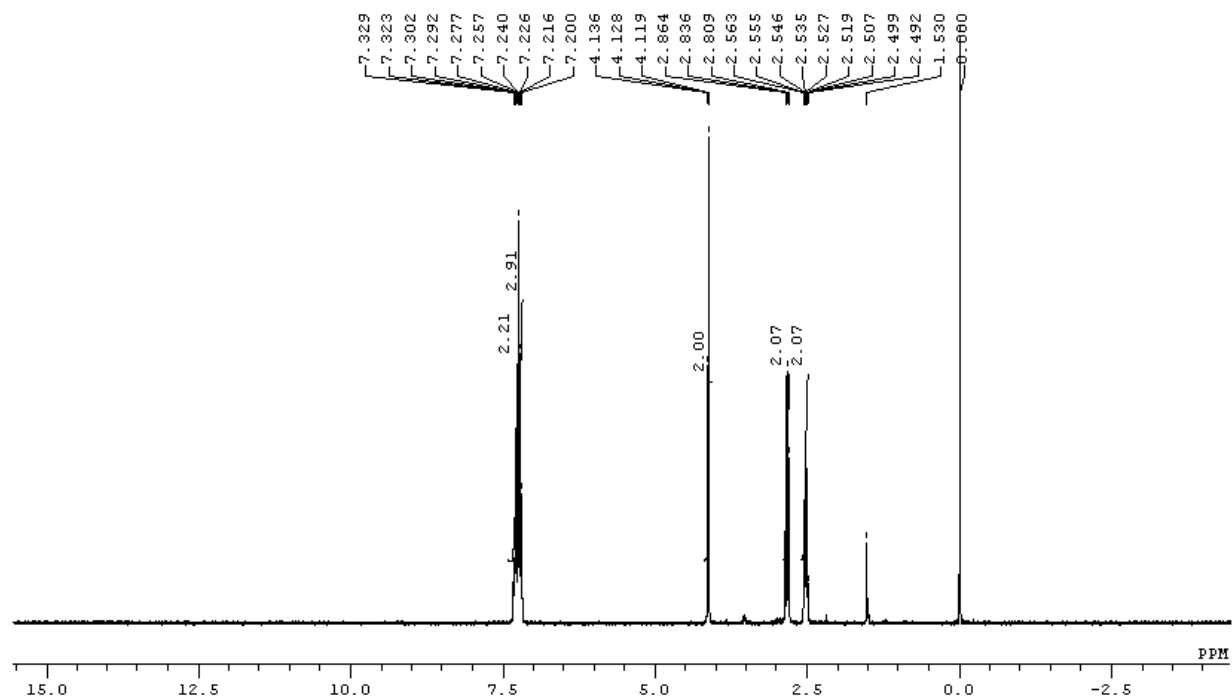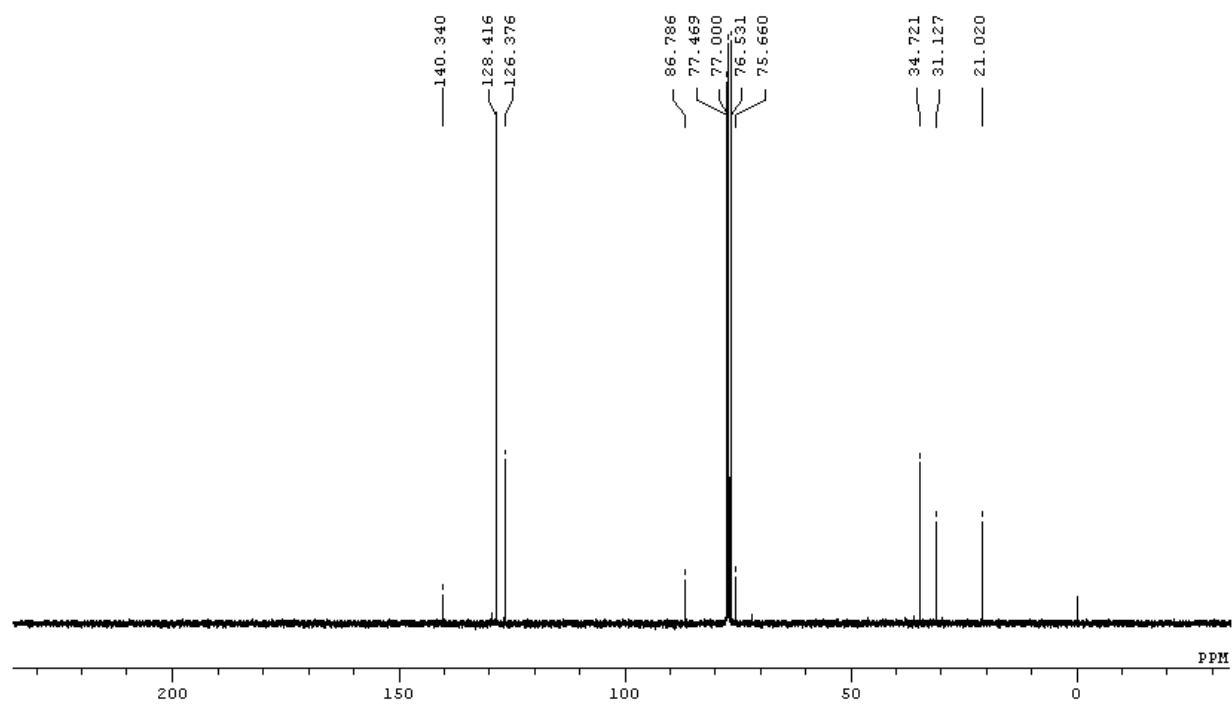

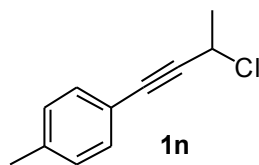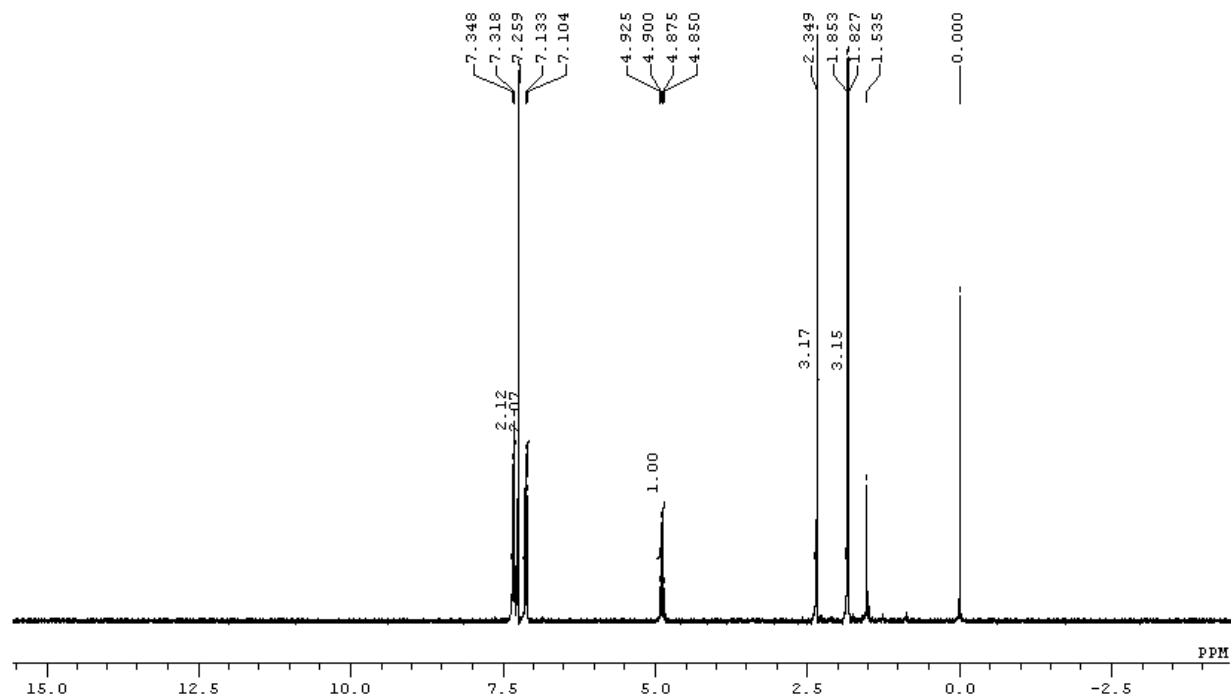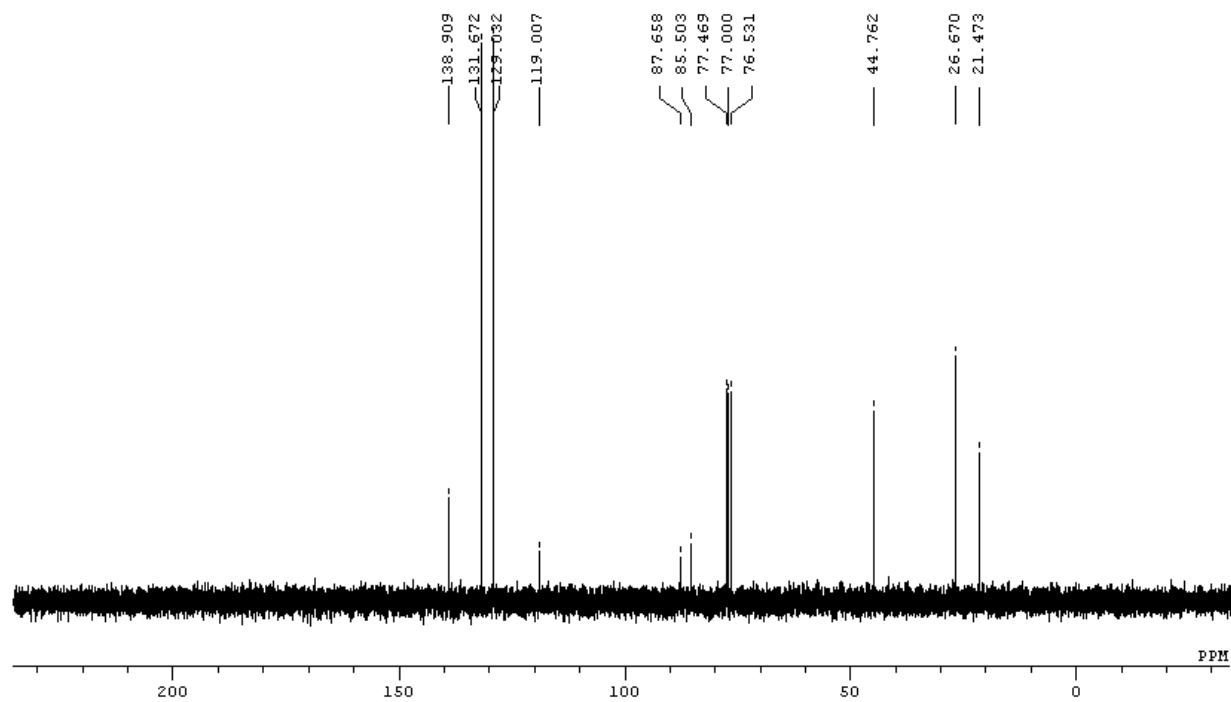

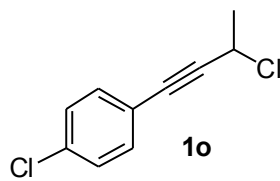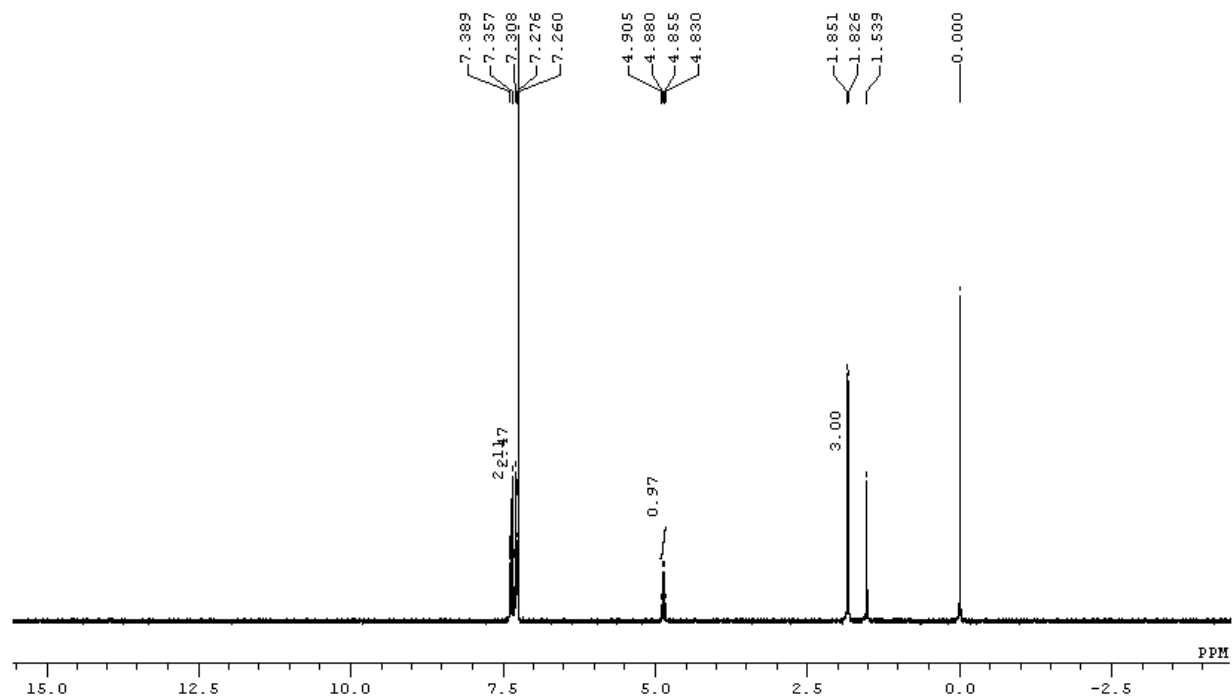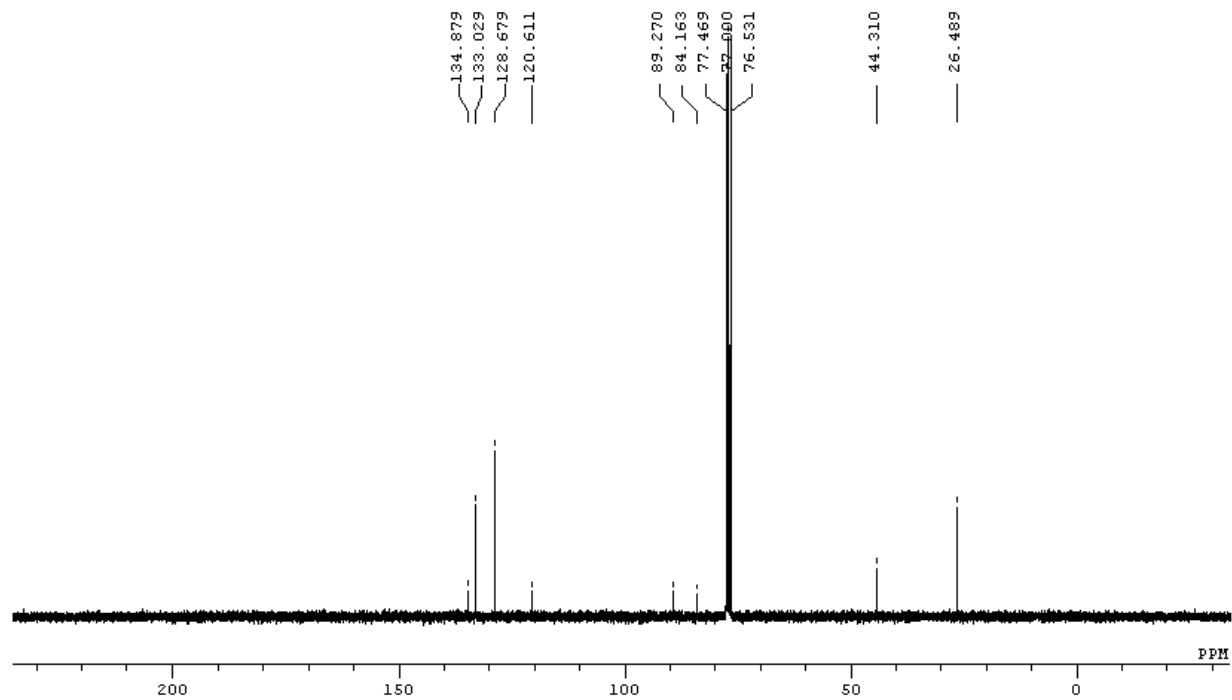

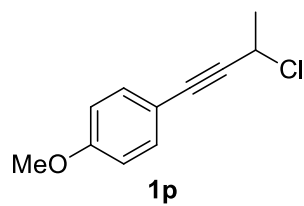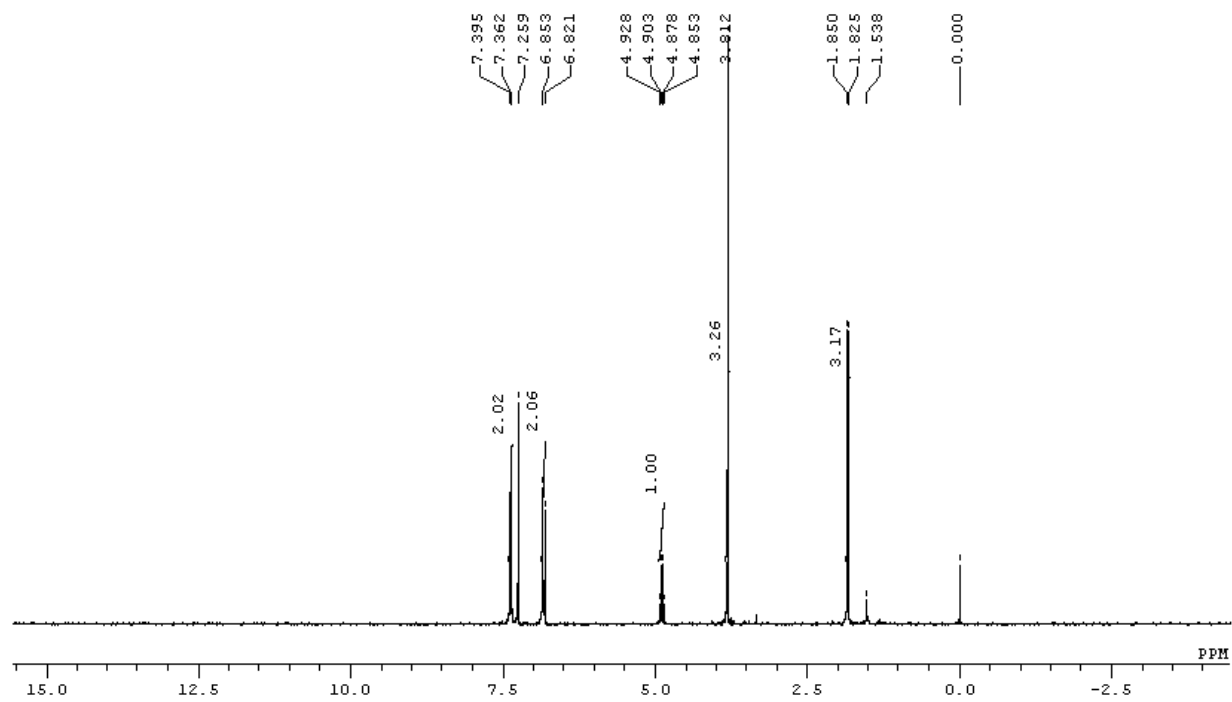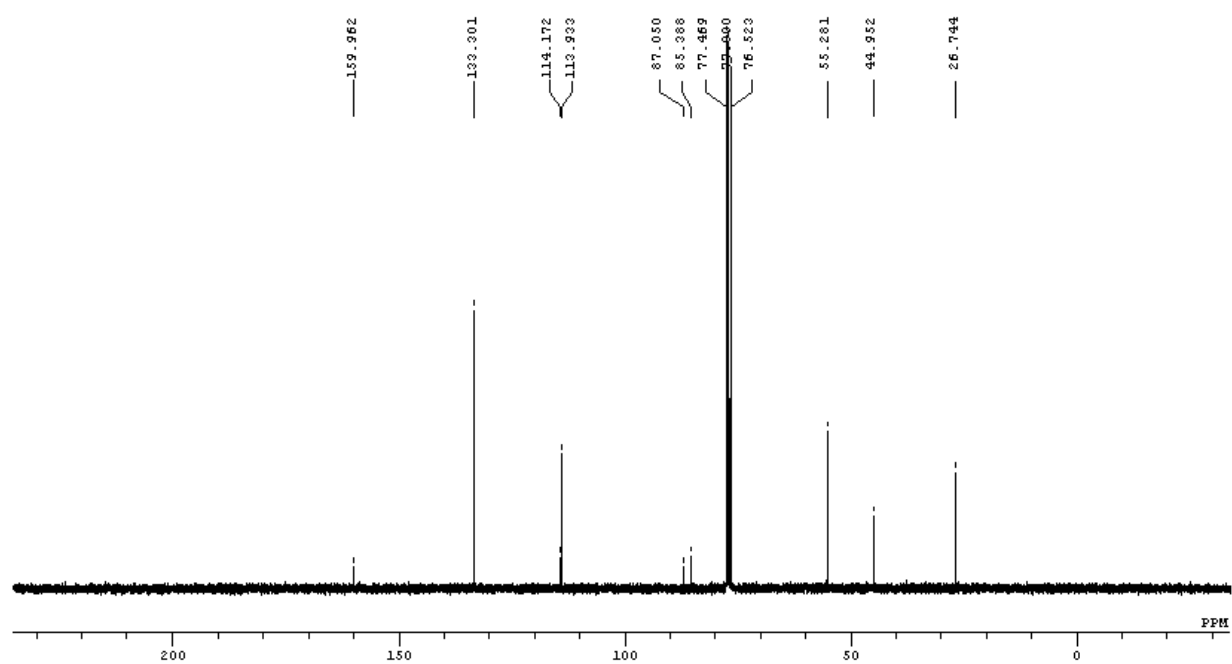

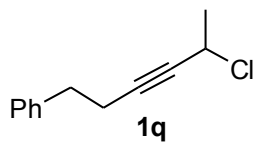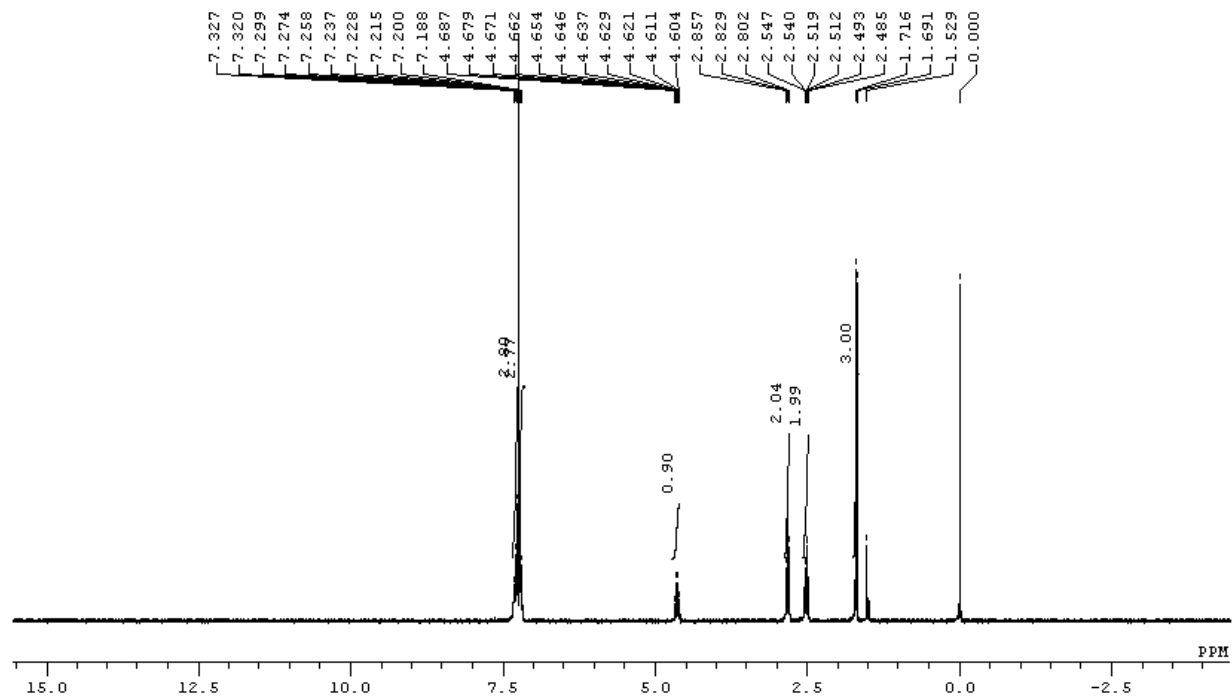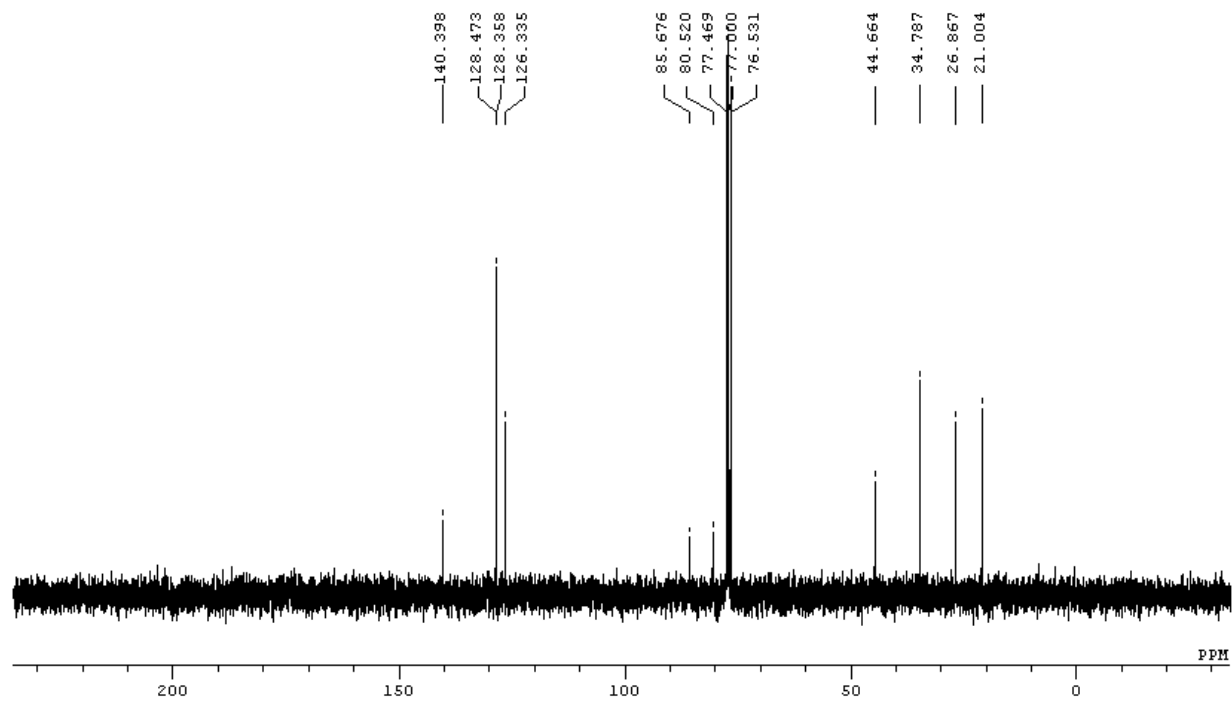

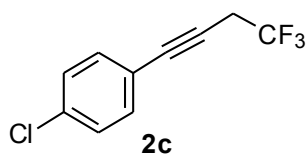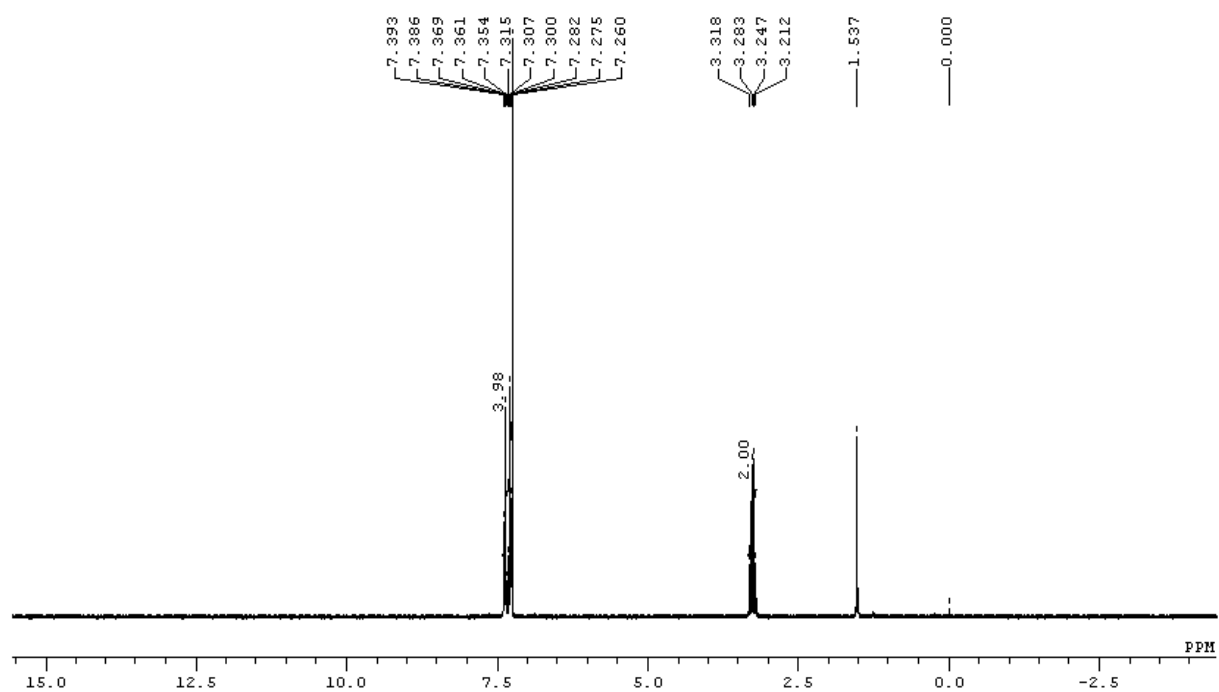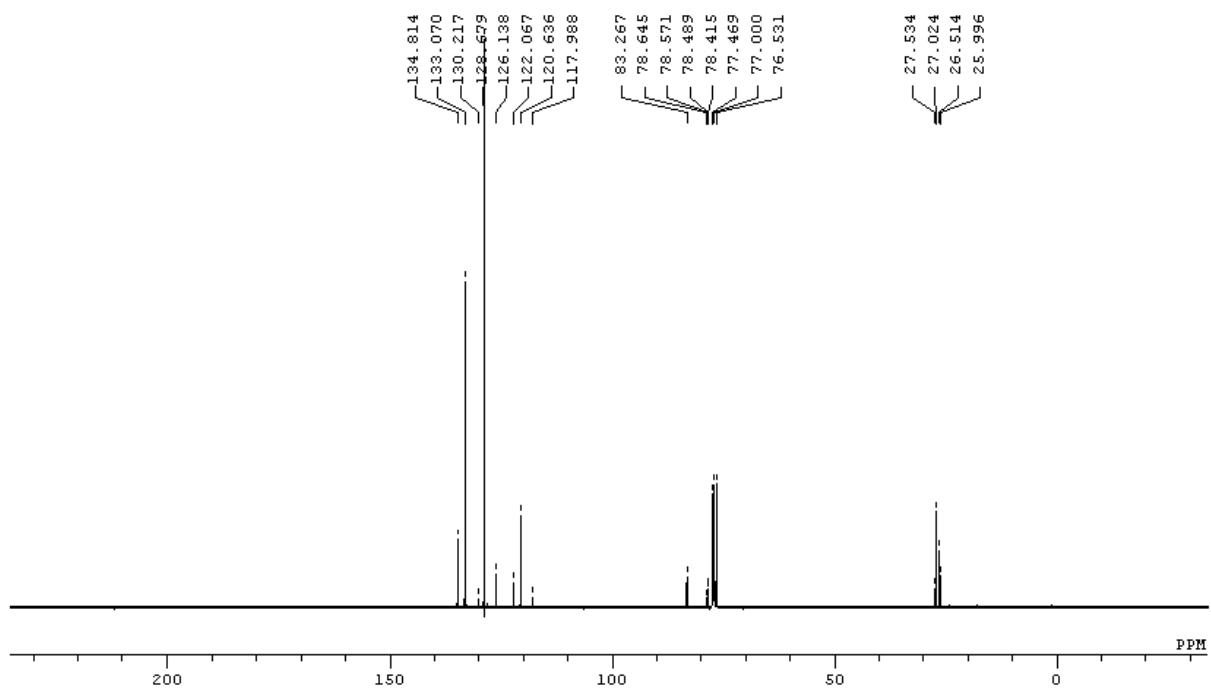

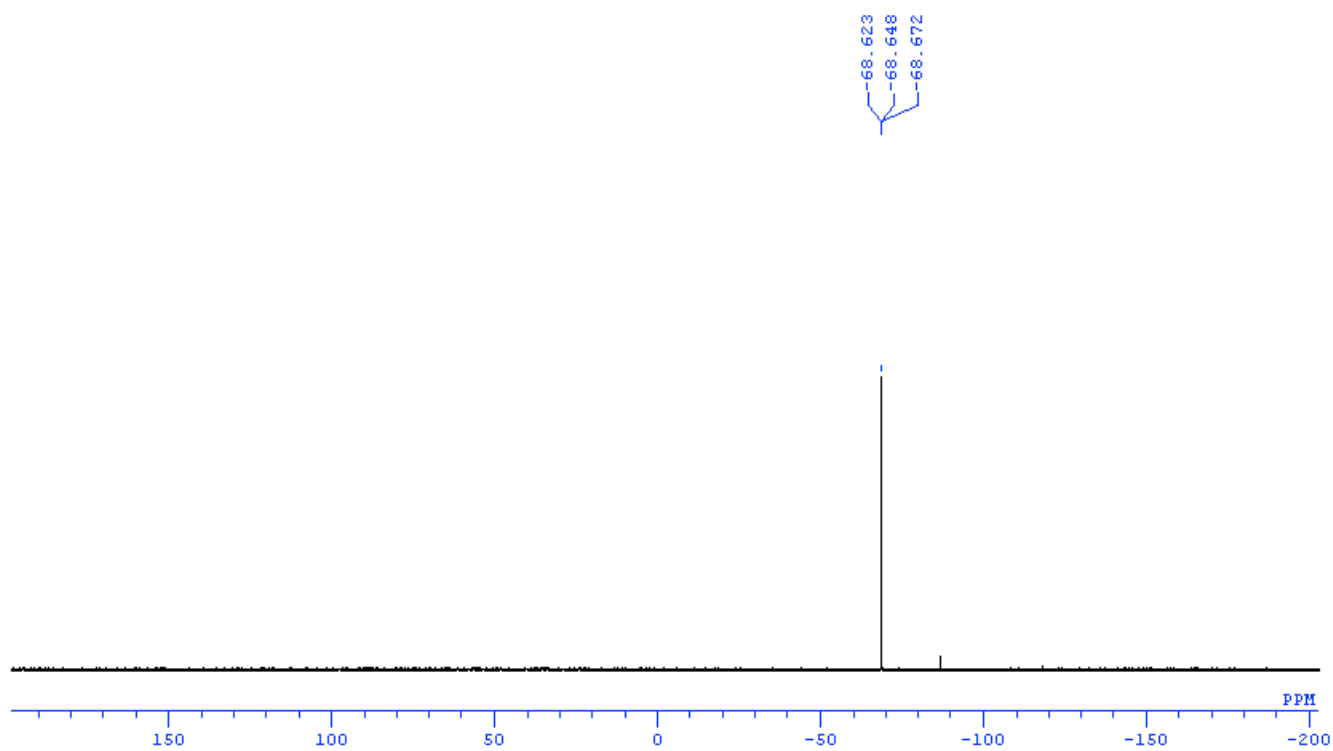

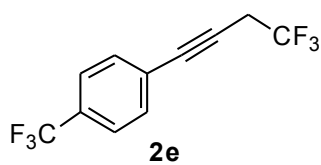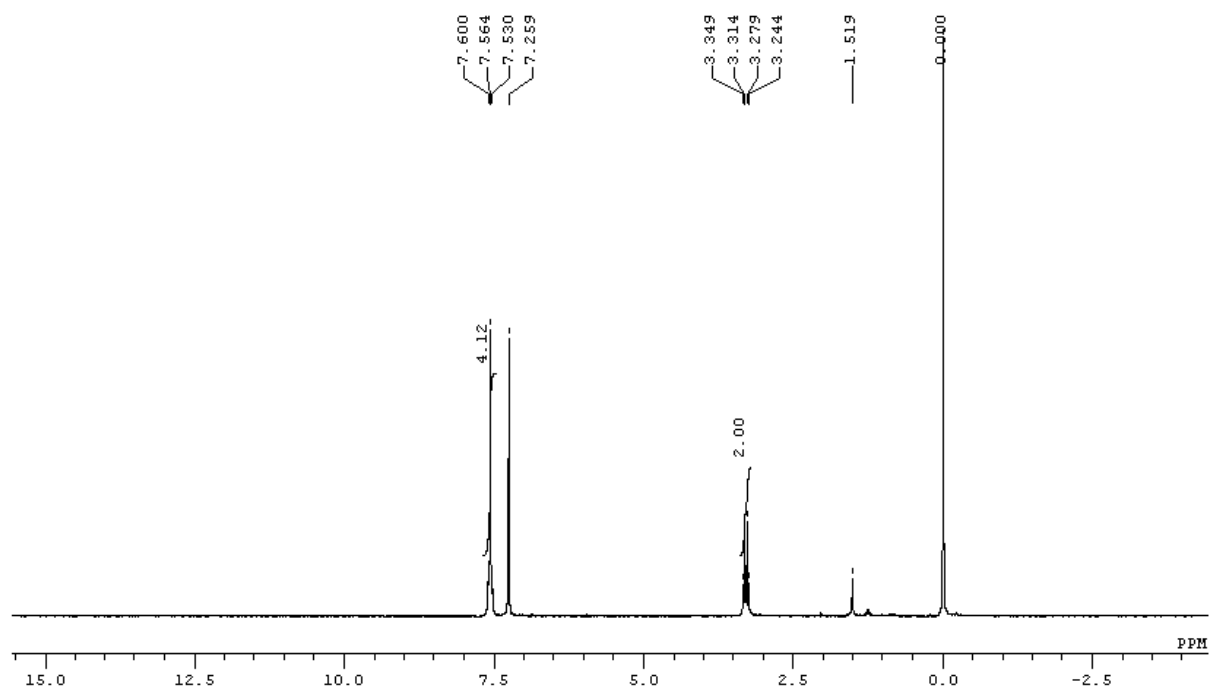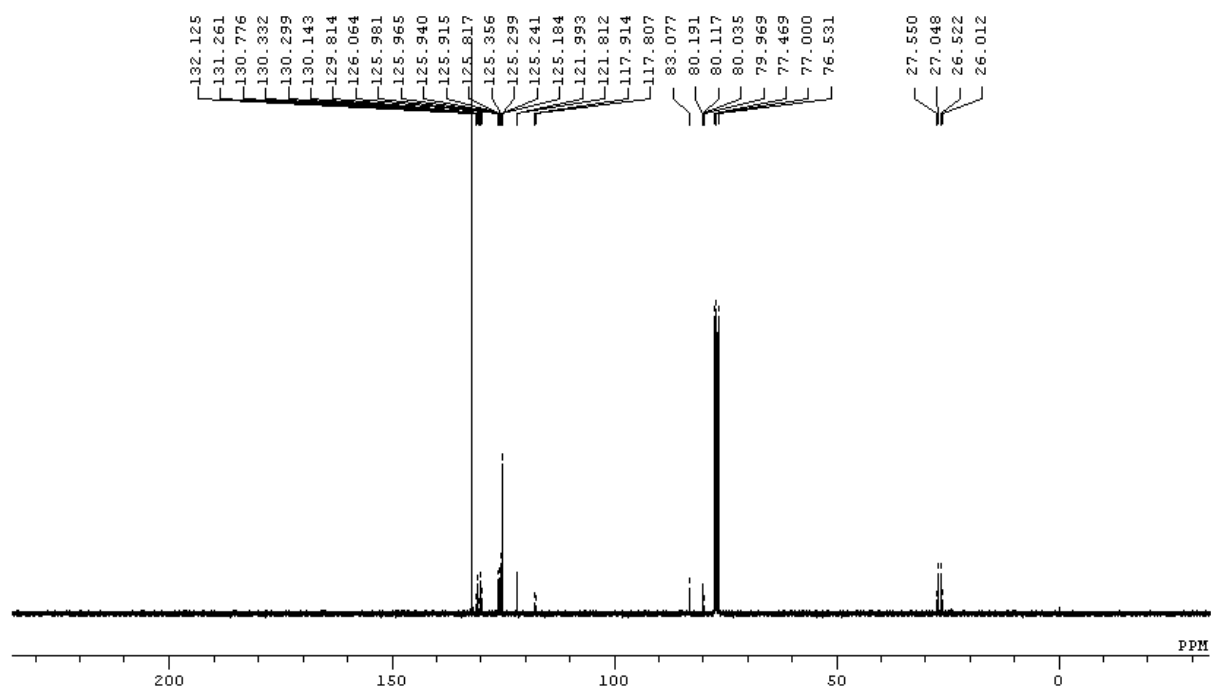



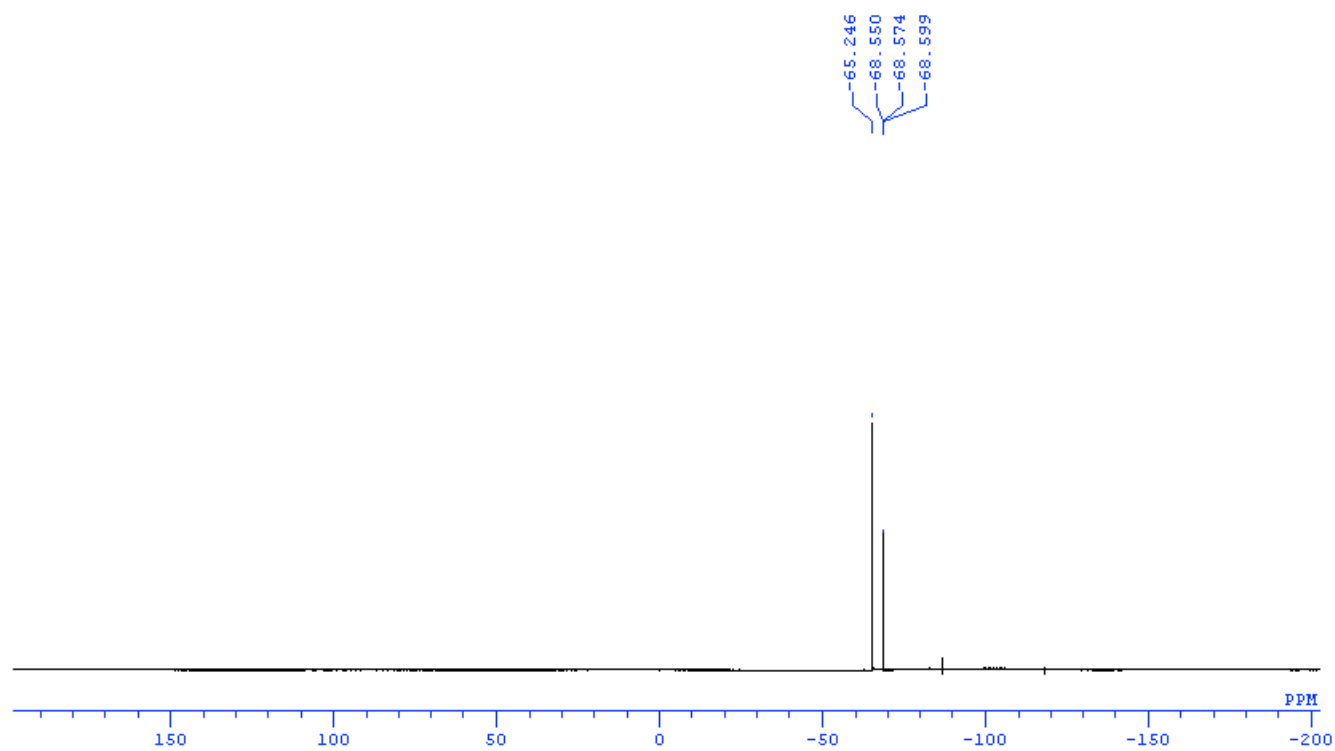

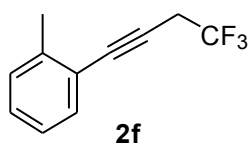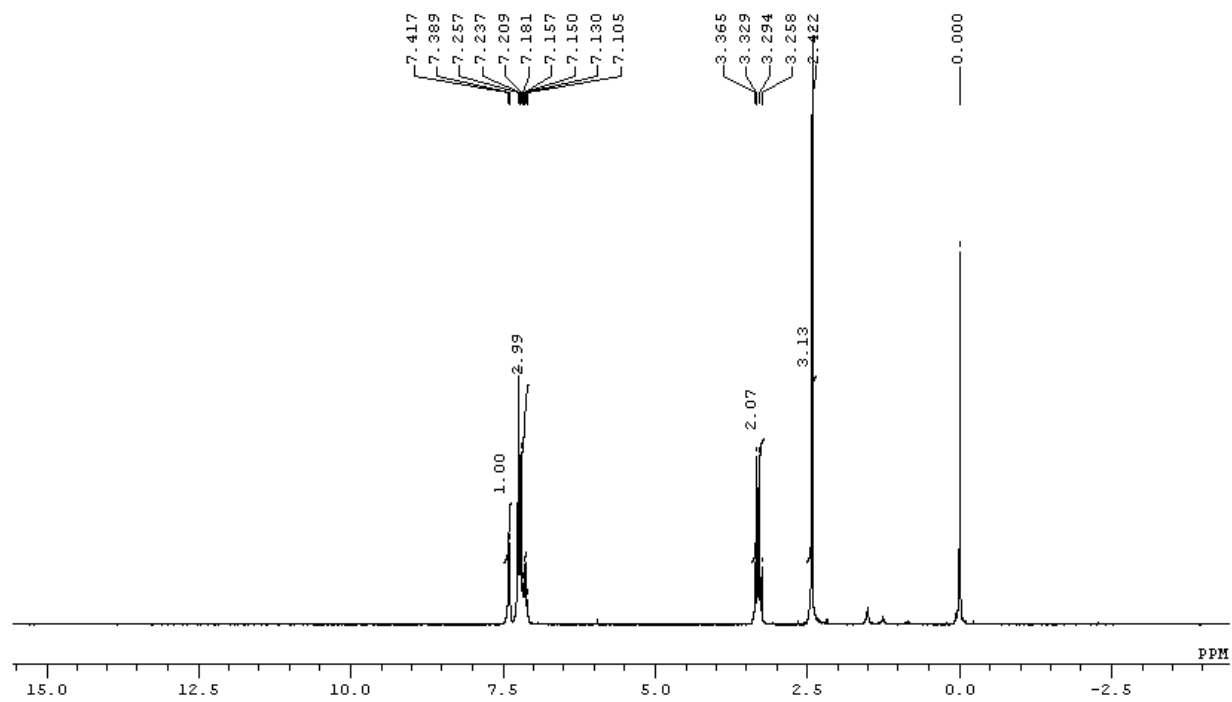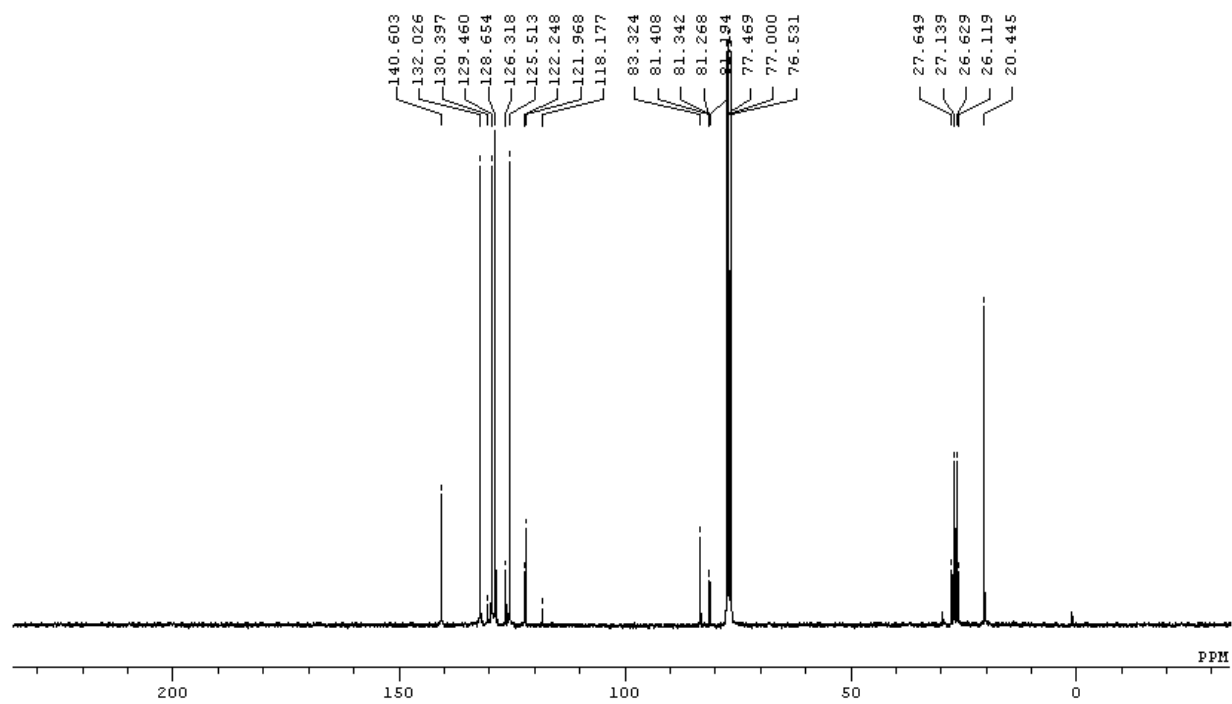

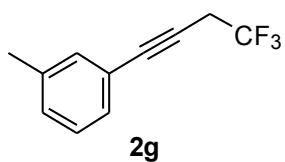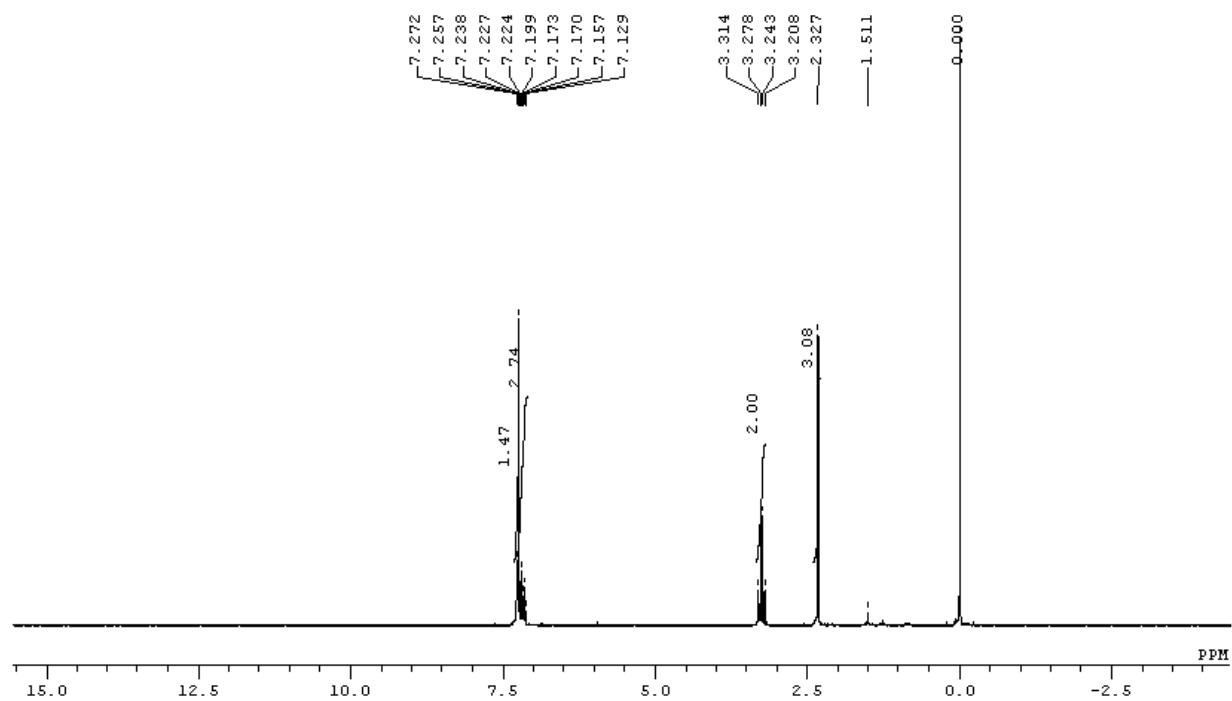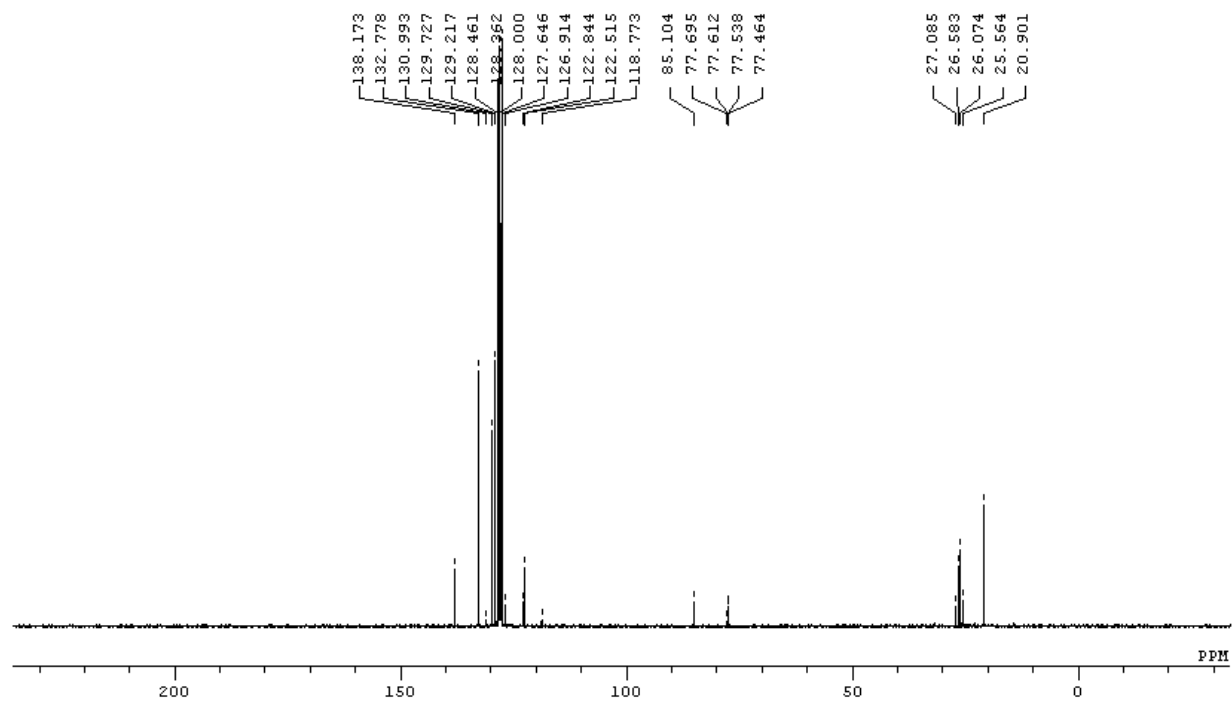

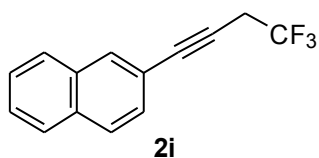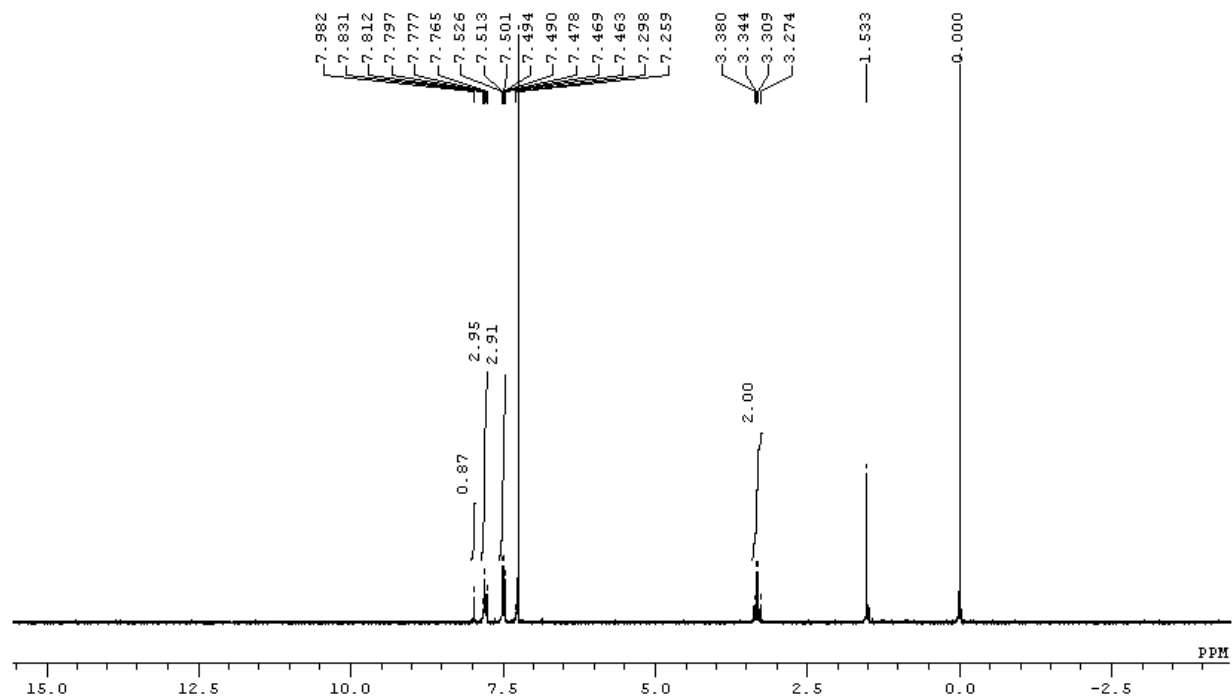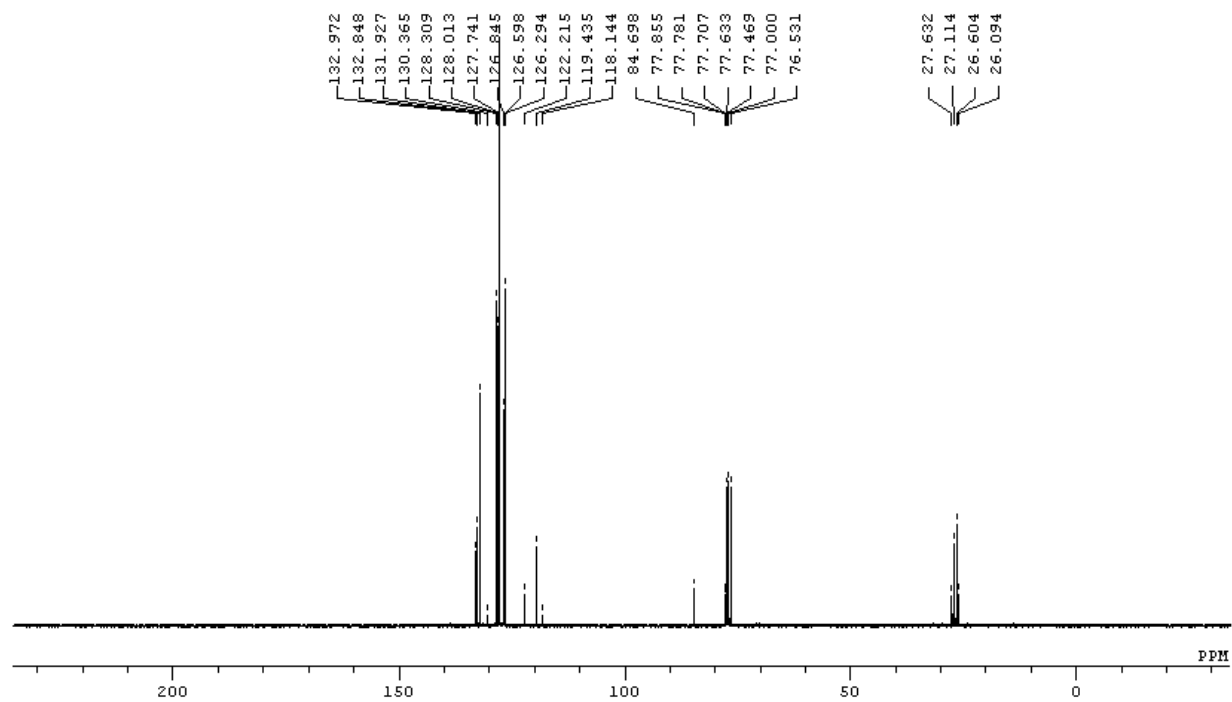

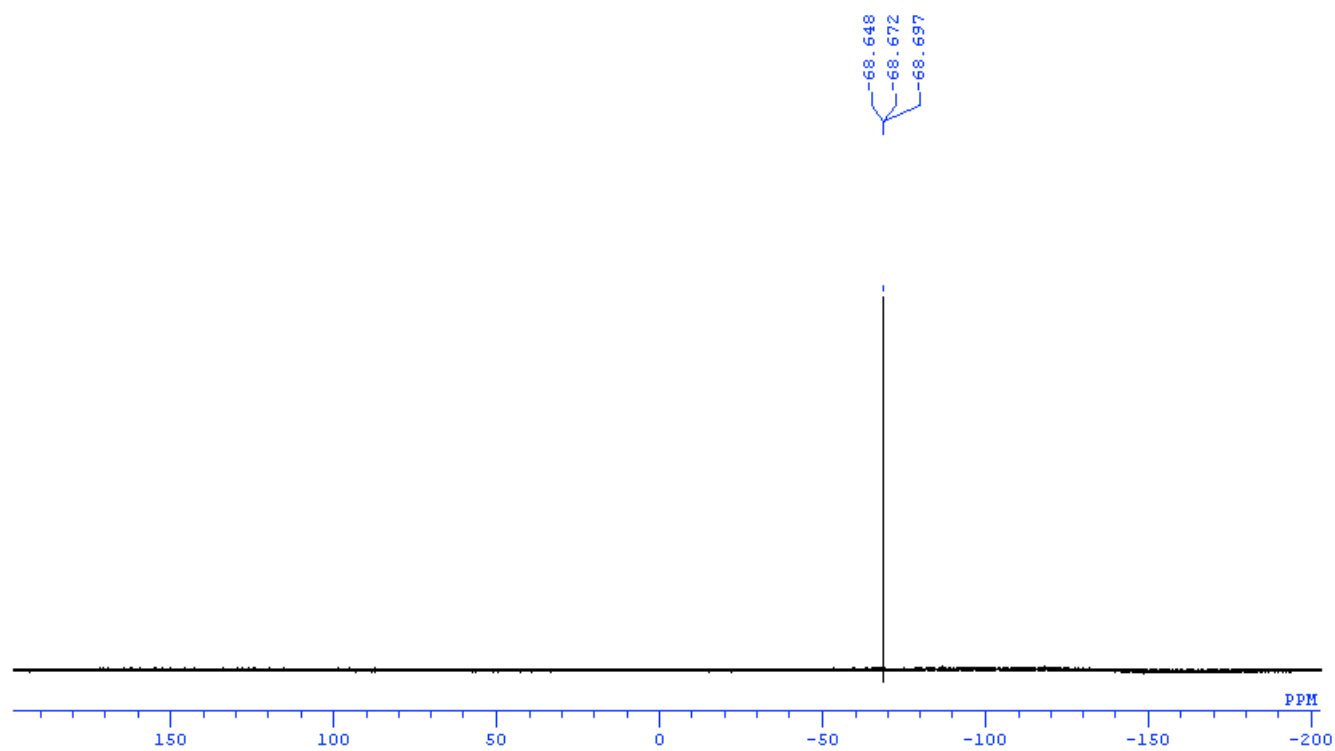

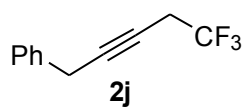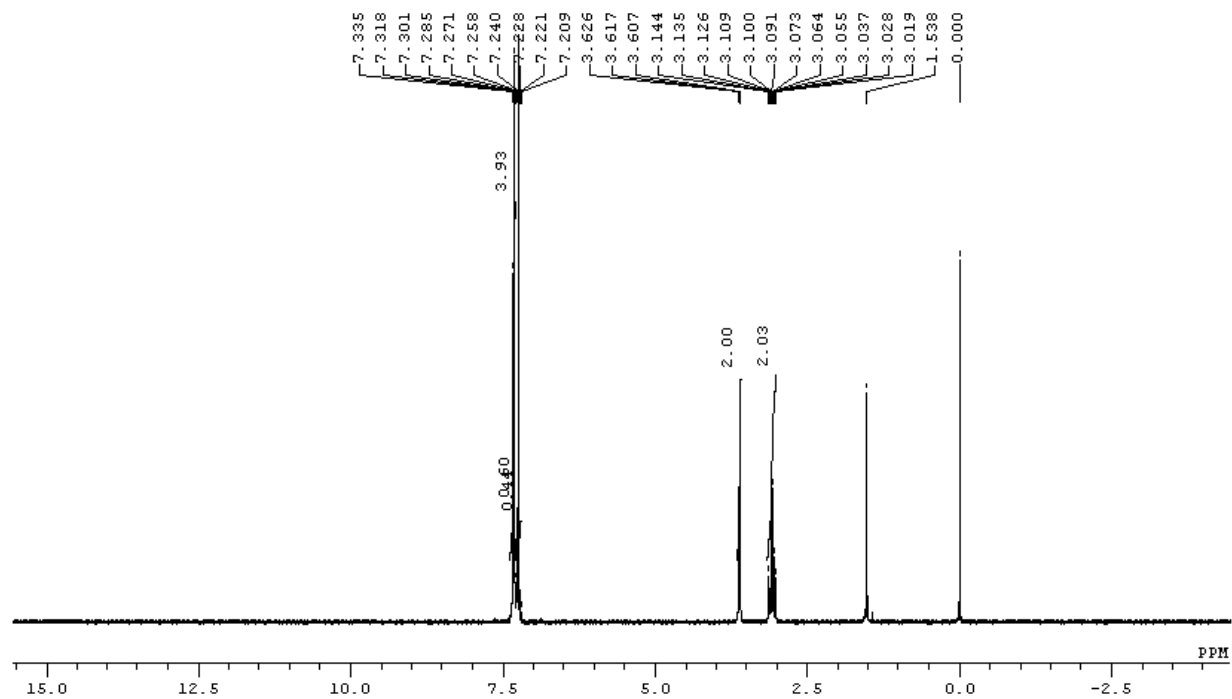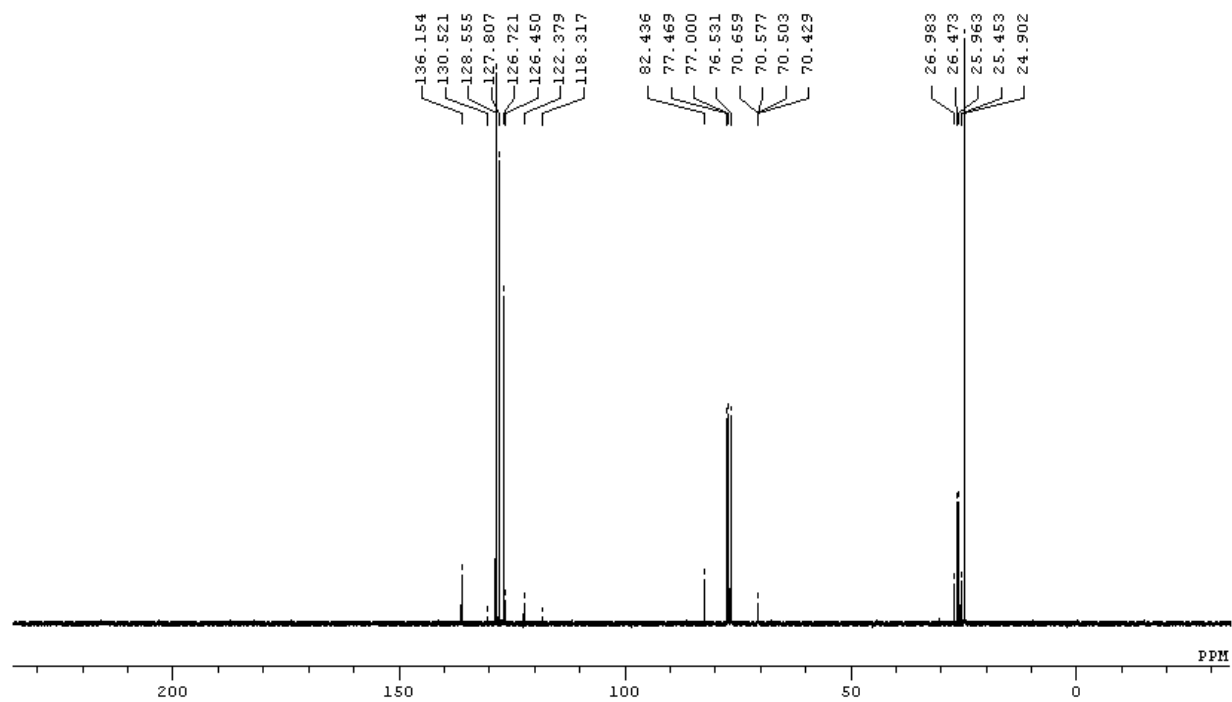

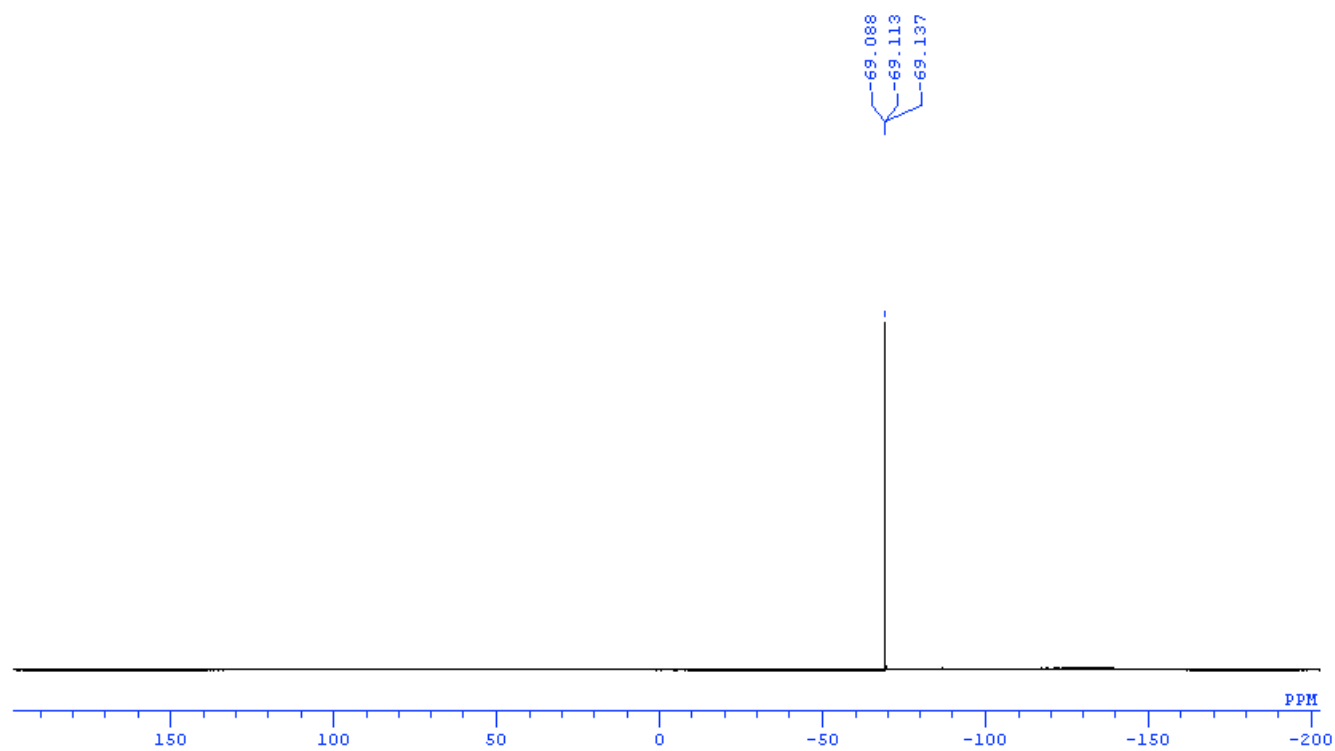

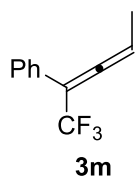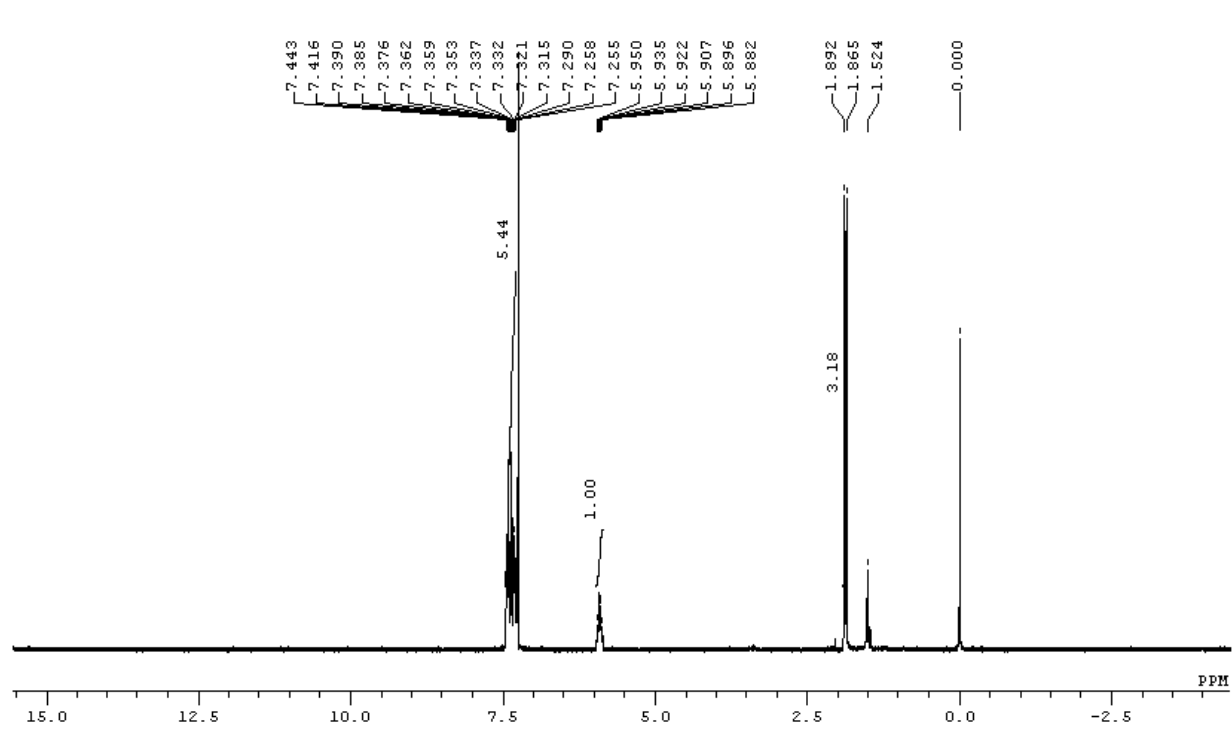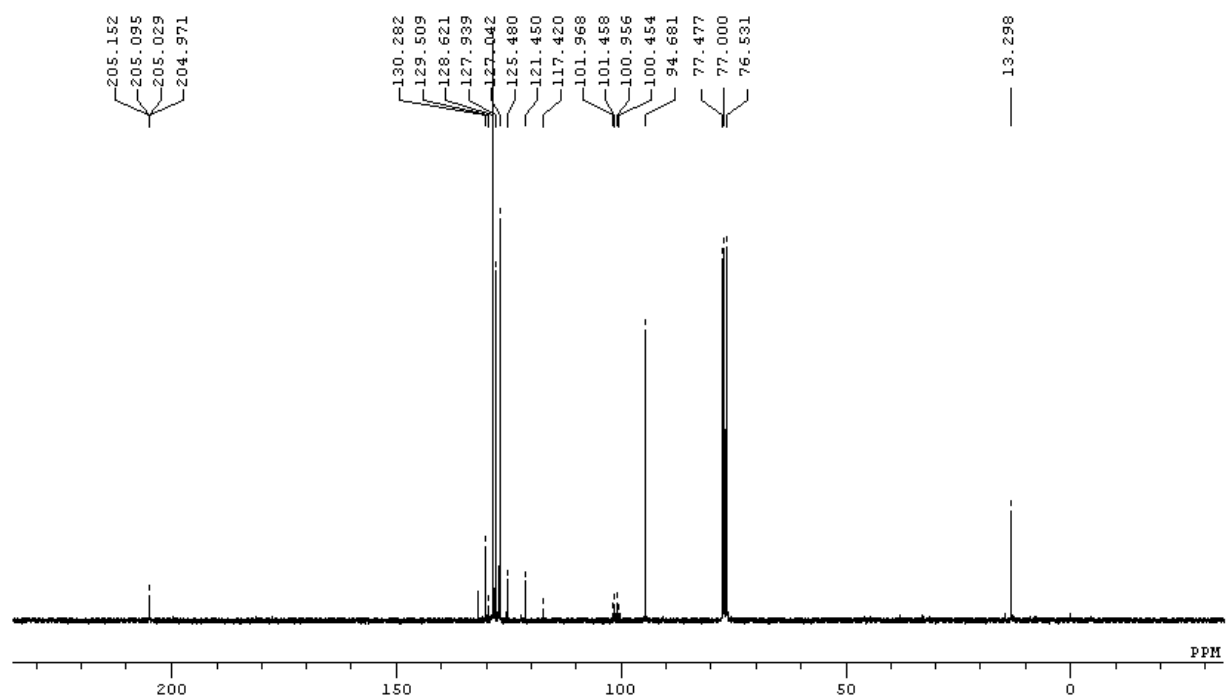



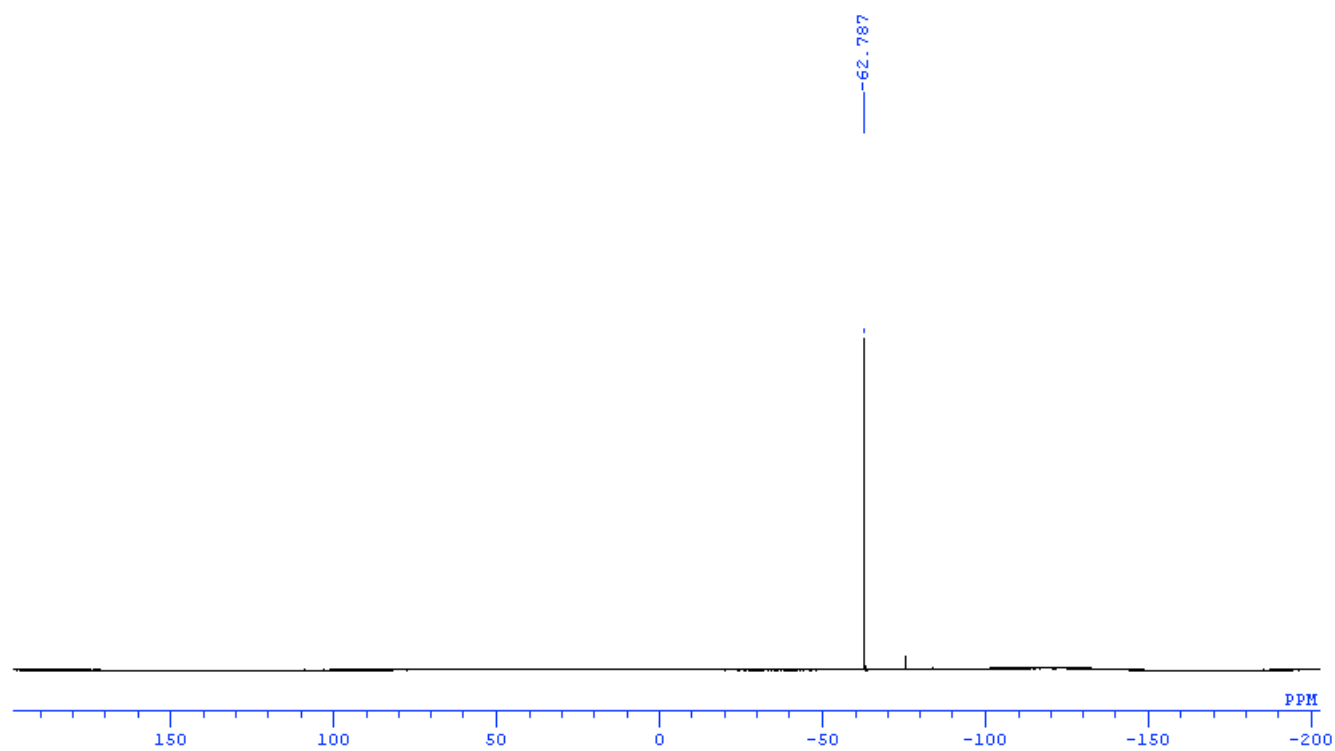

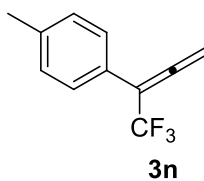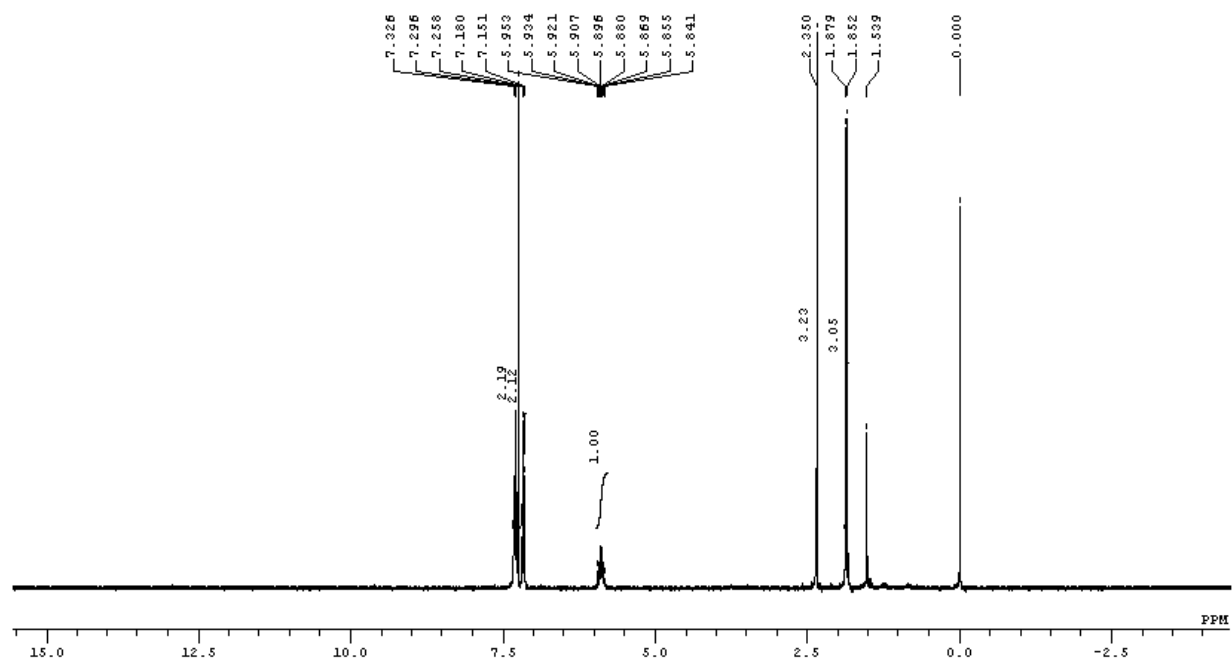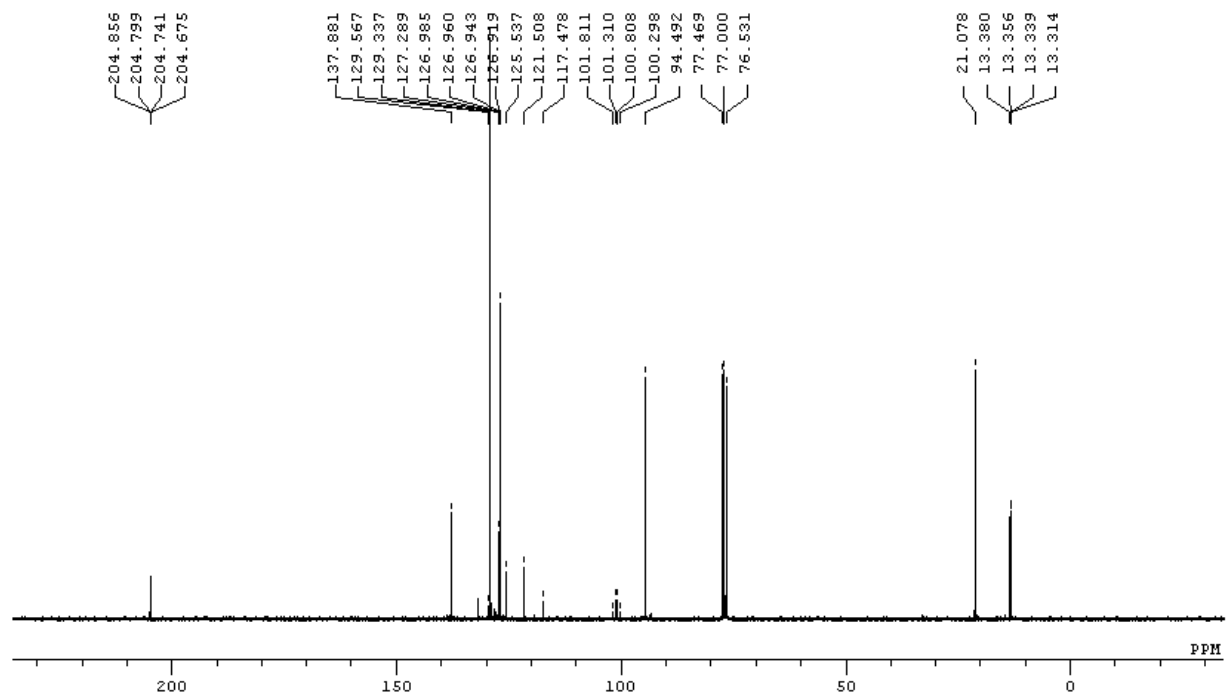

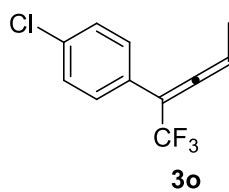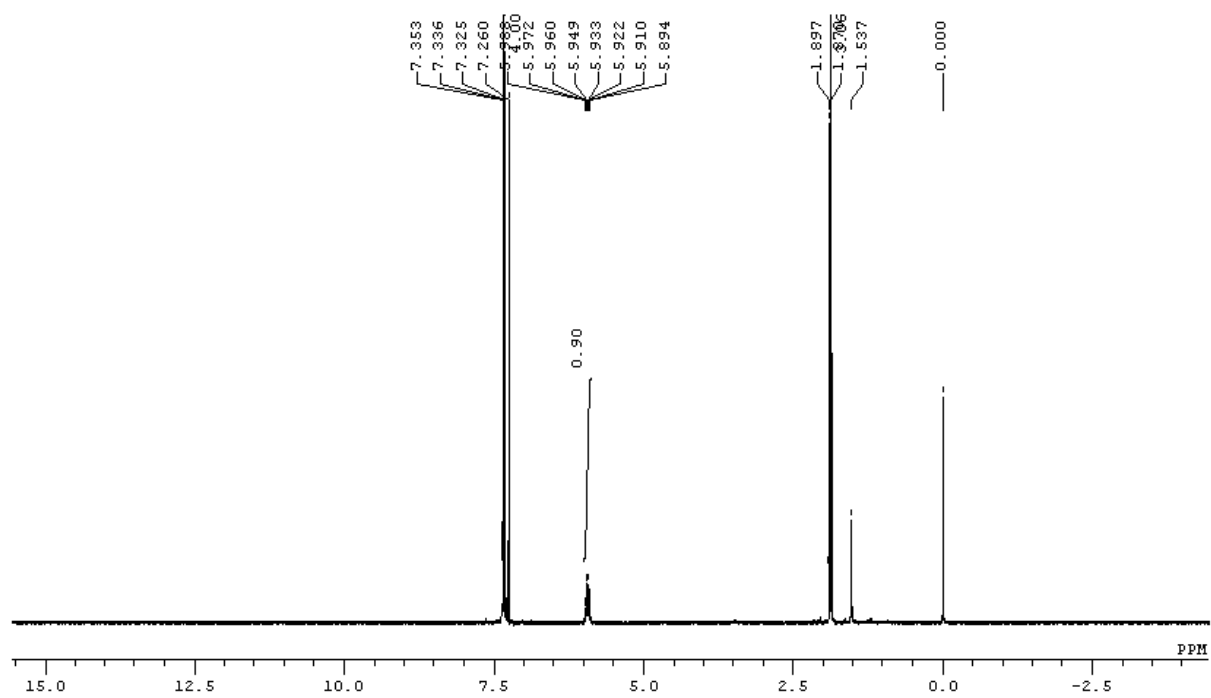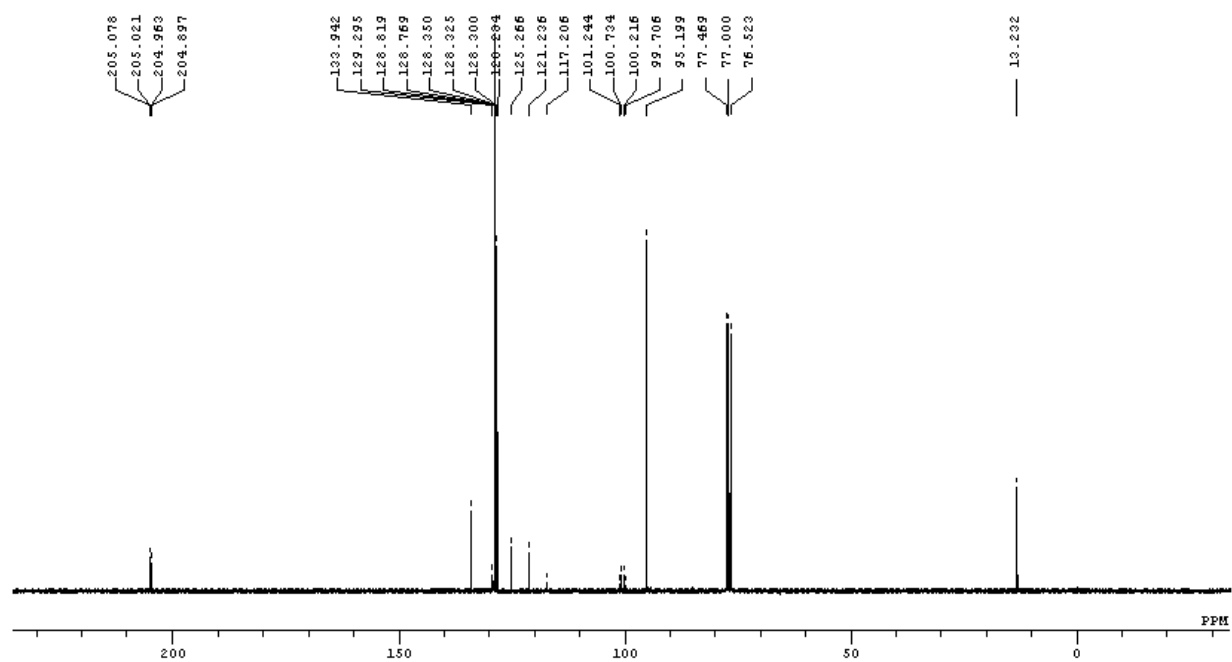

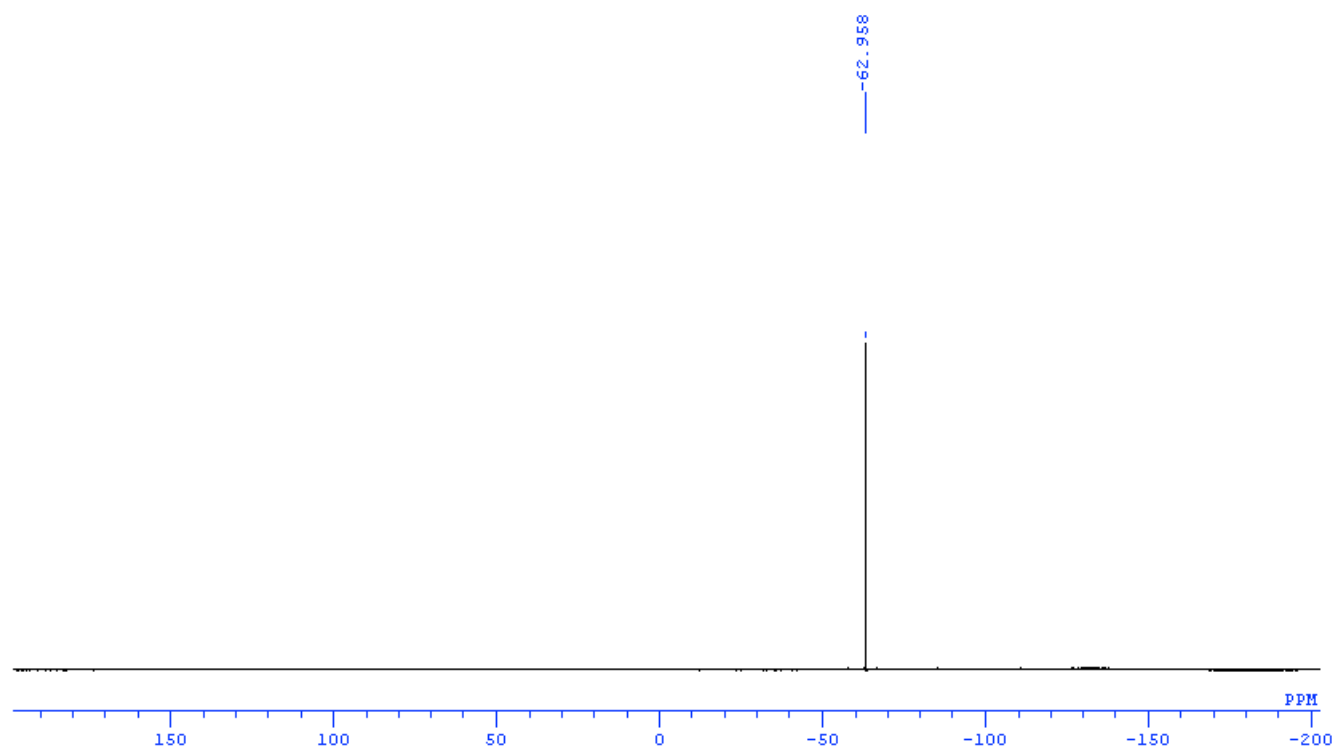

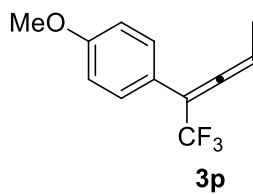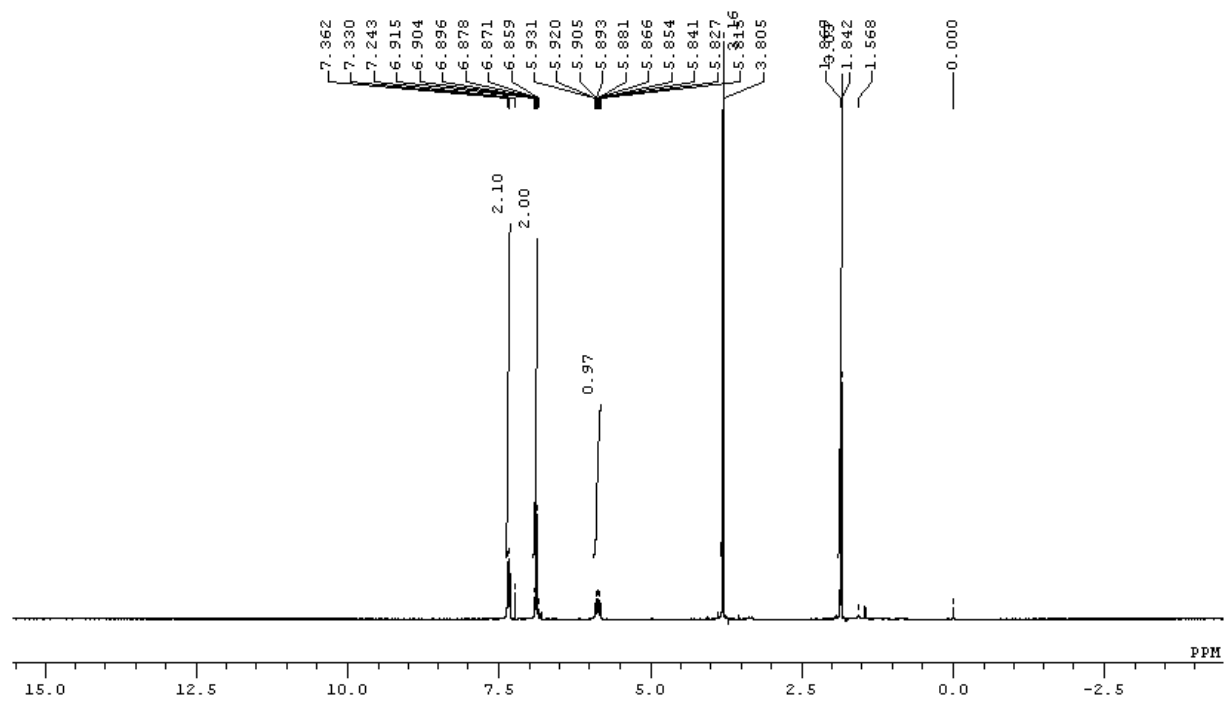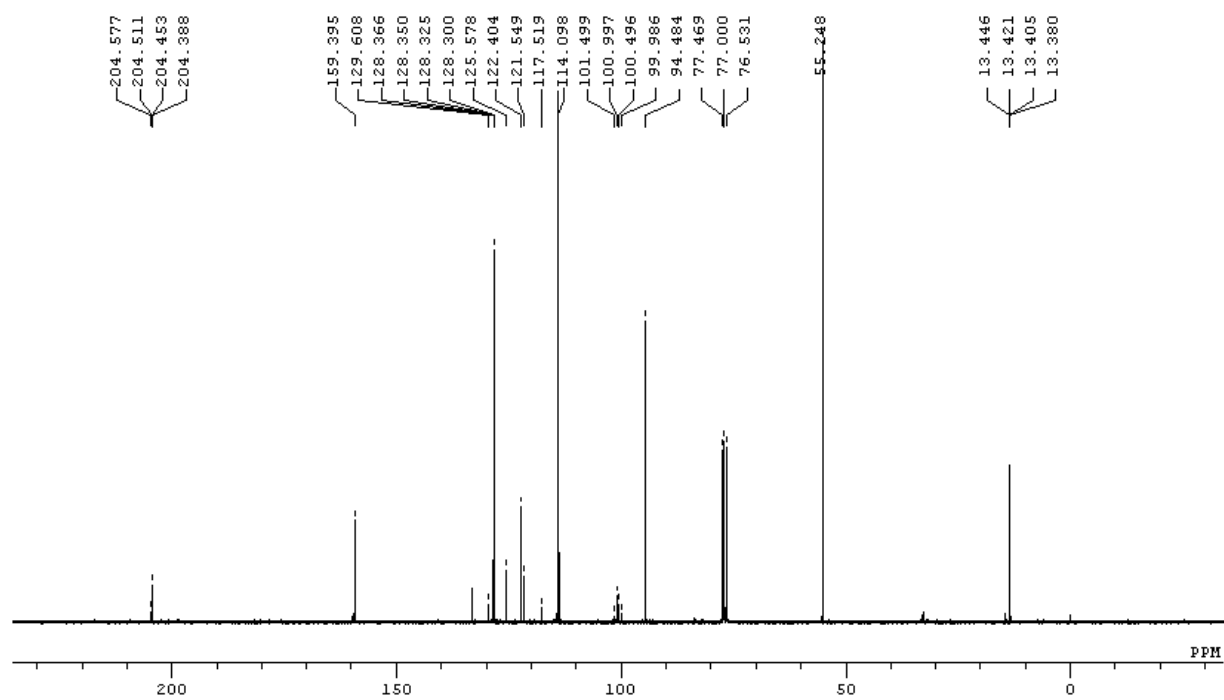

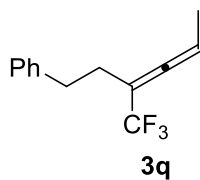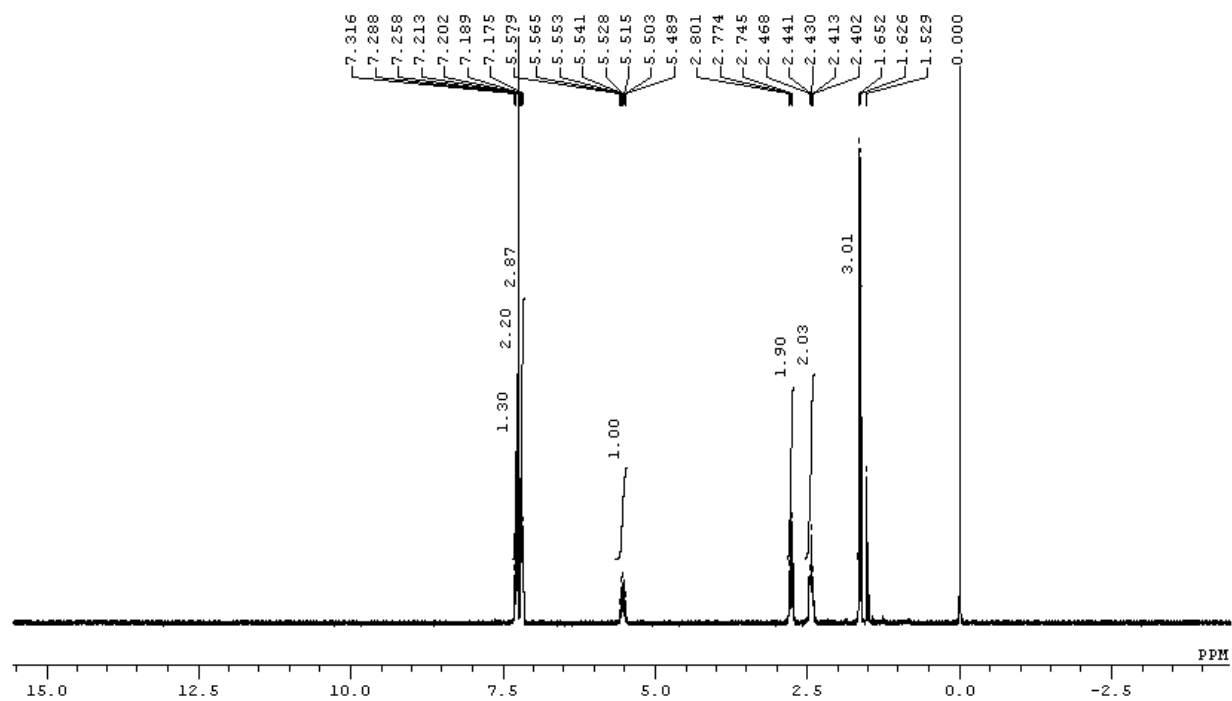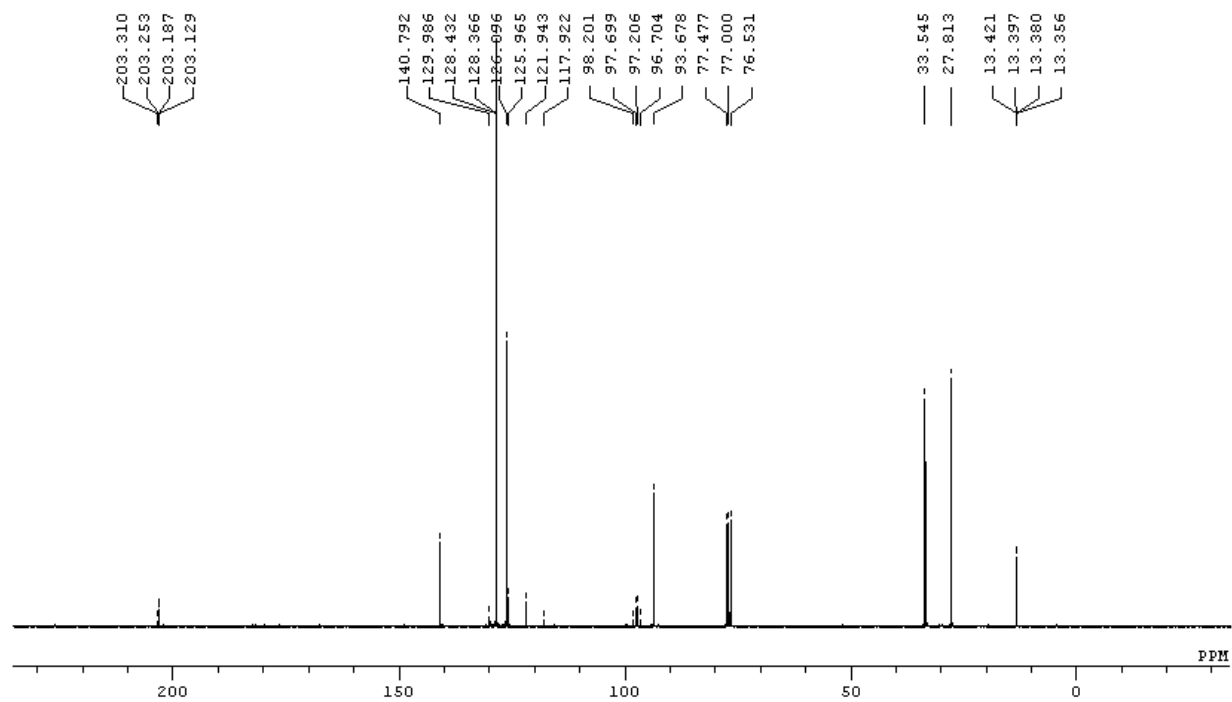

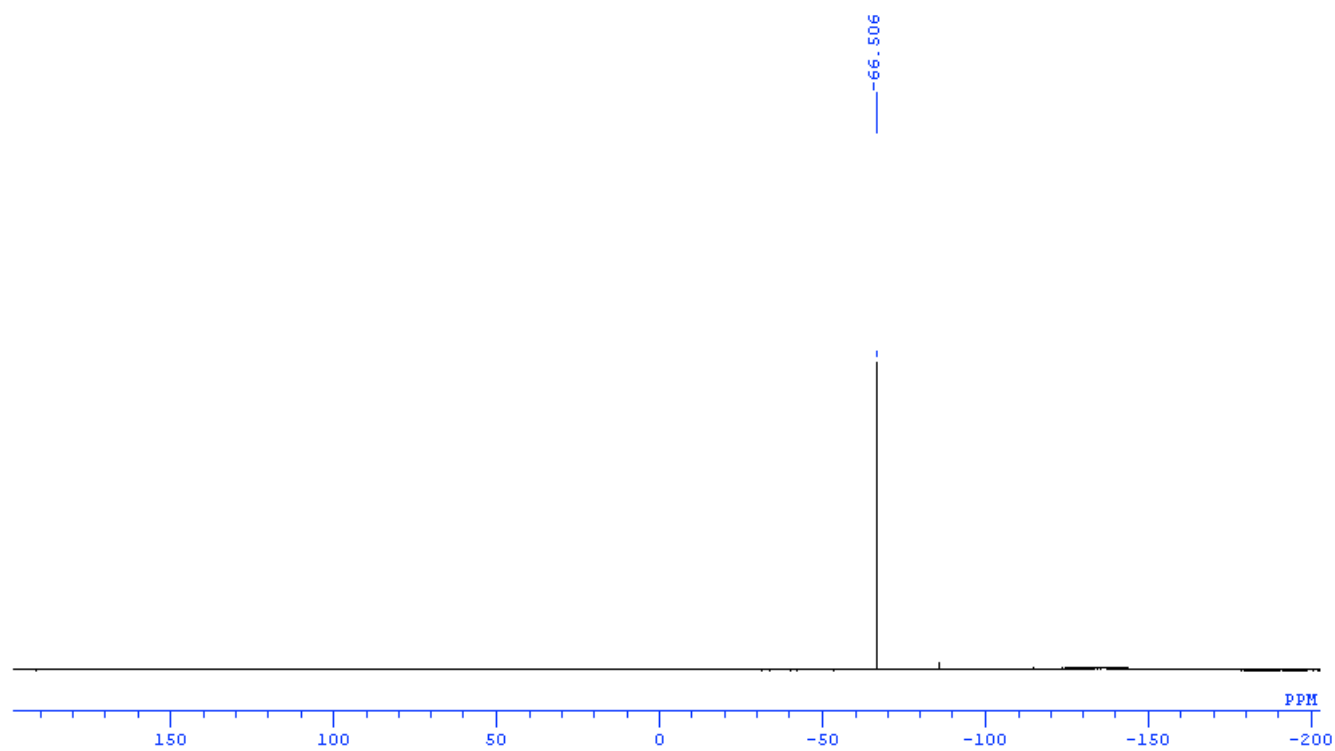

Supplement: c3cc44434a.pdf [file c3cc44434a.pdf]
